# Supplementary material
Source: PubMed Central journal article supplement (PMC7819642)

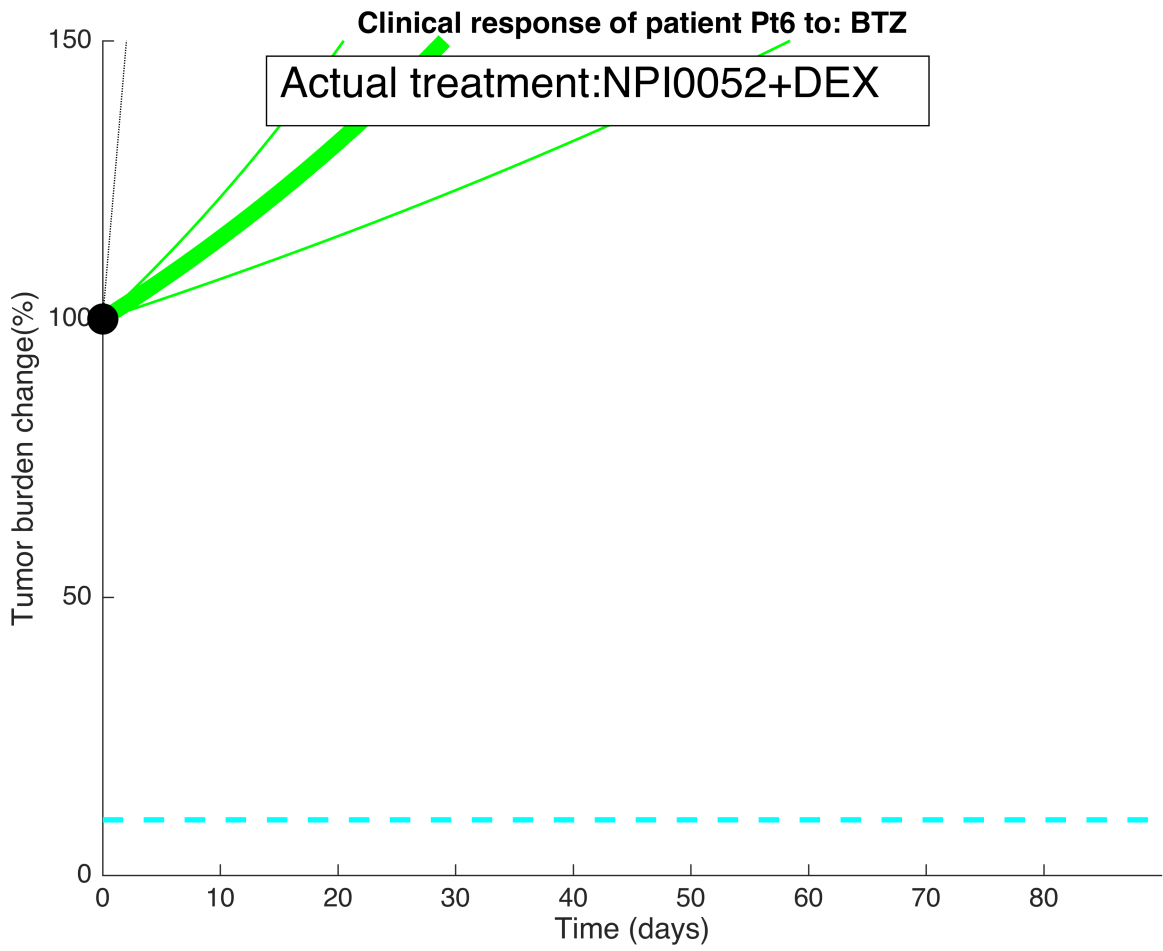

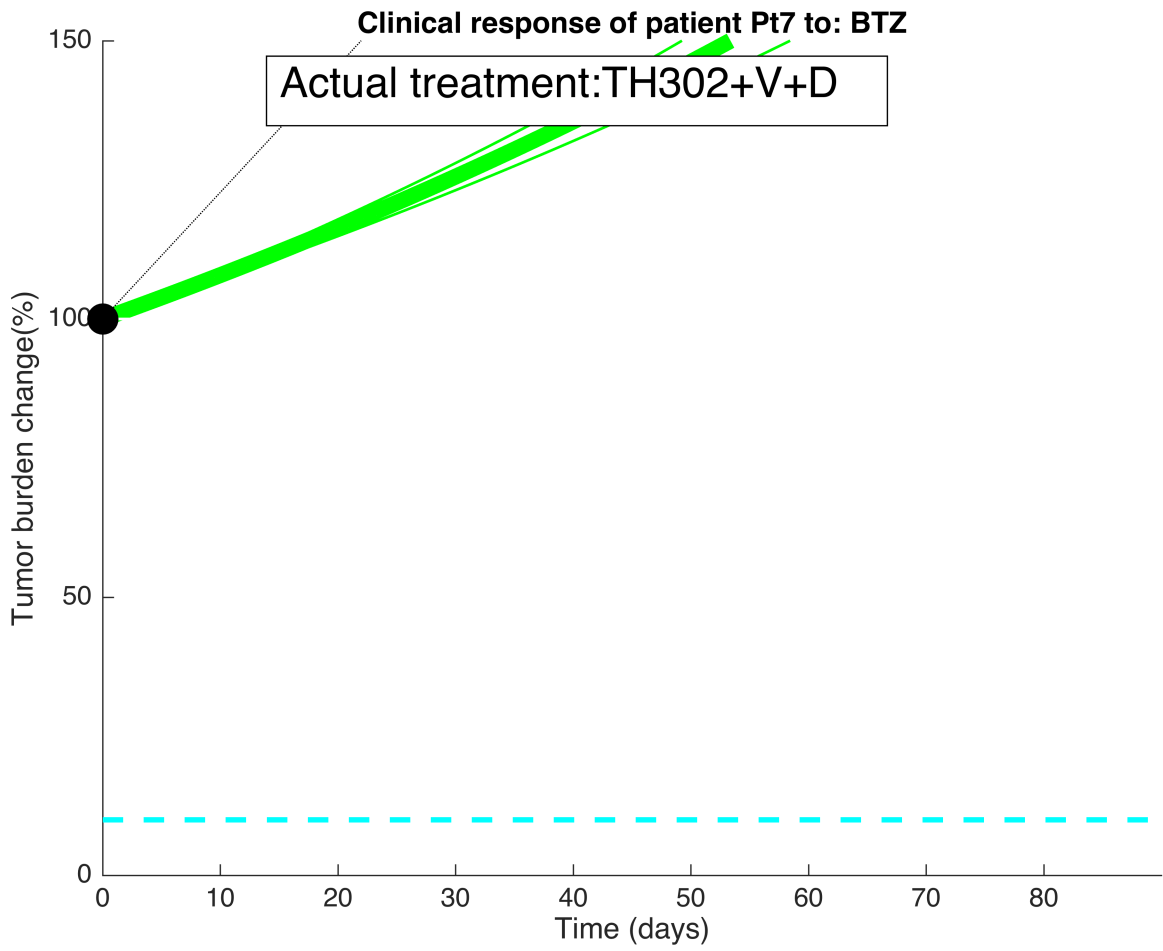

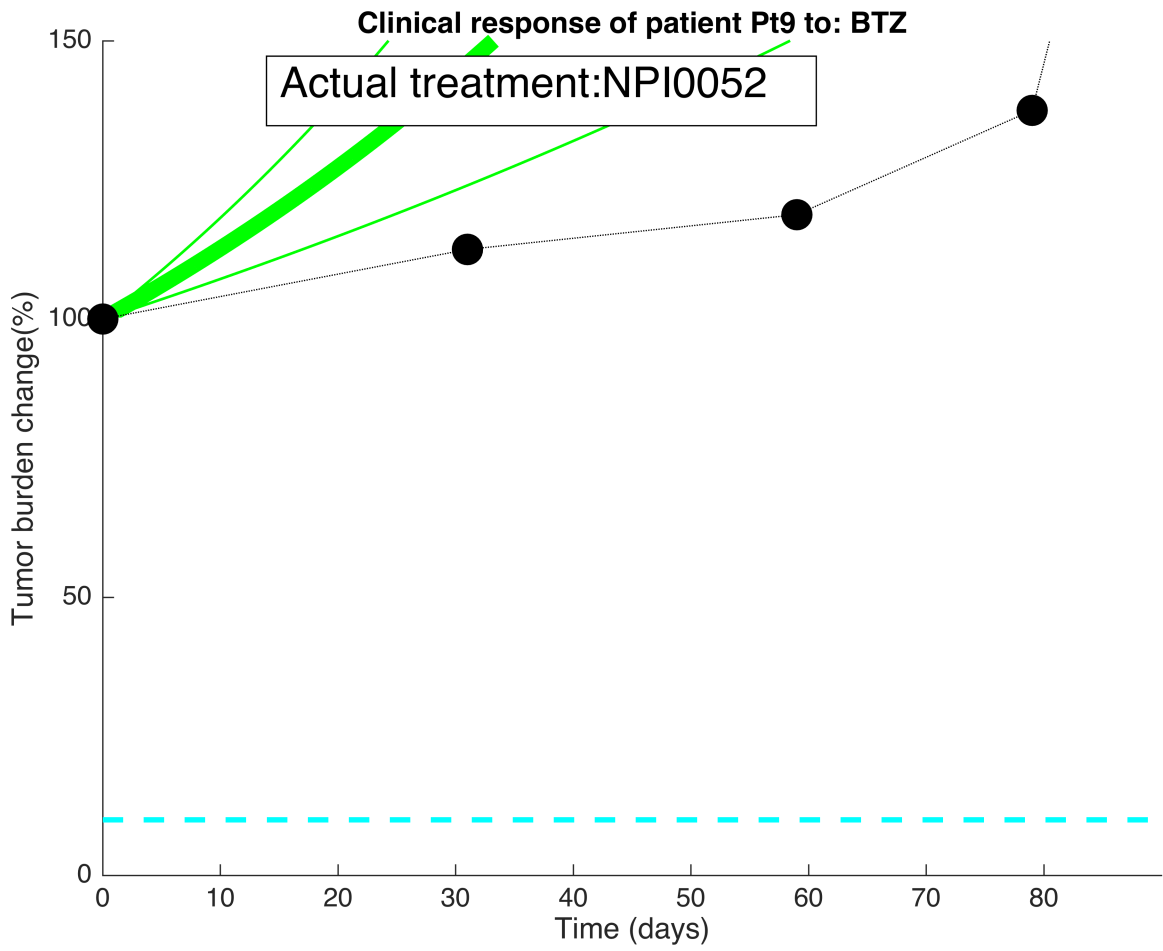

Clinical response of patient 10 to: BTZ+LEN

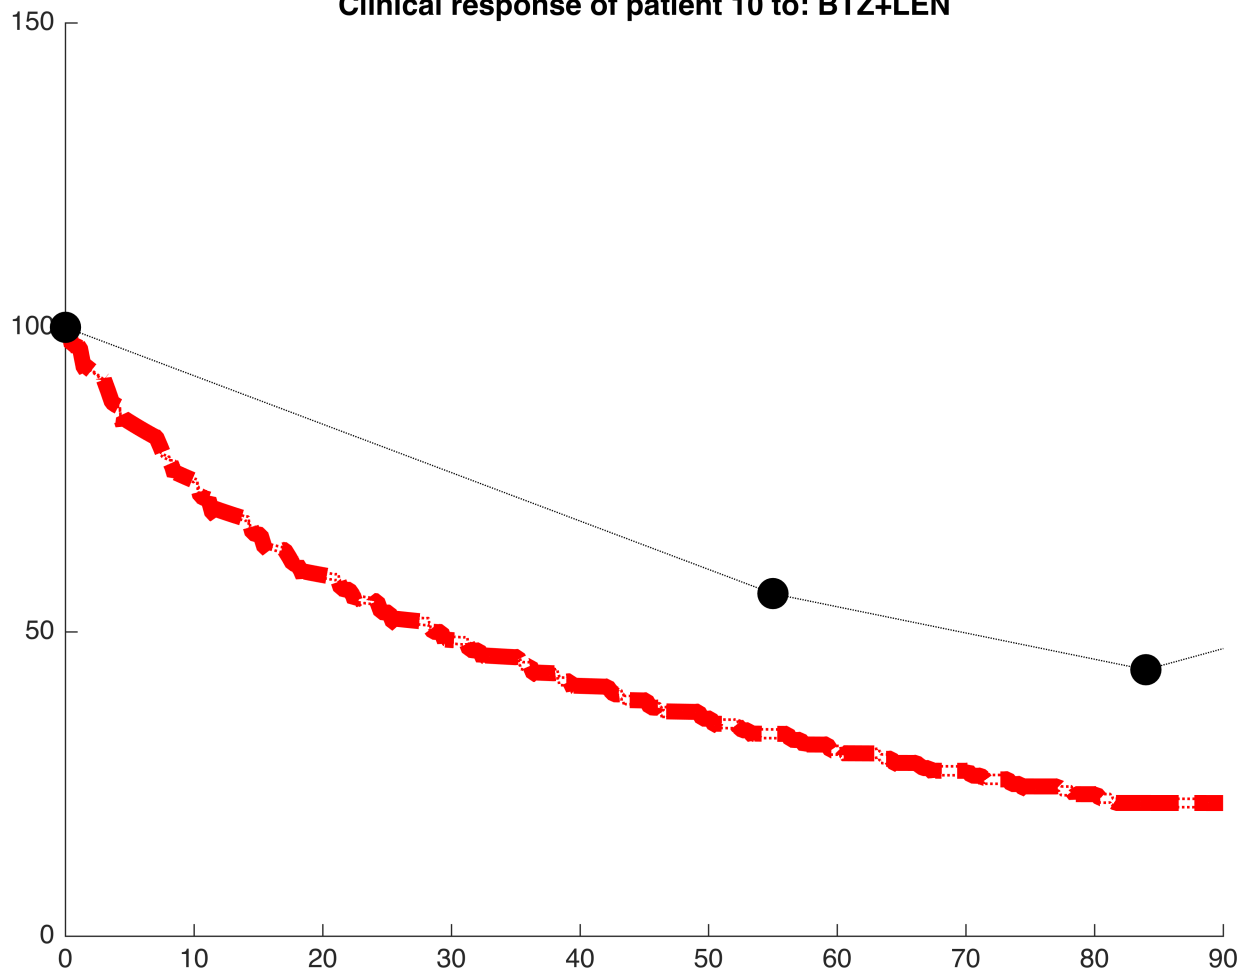



Clinical response of patient 11 to: BTZ+DEX

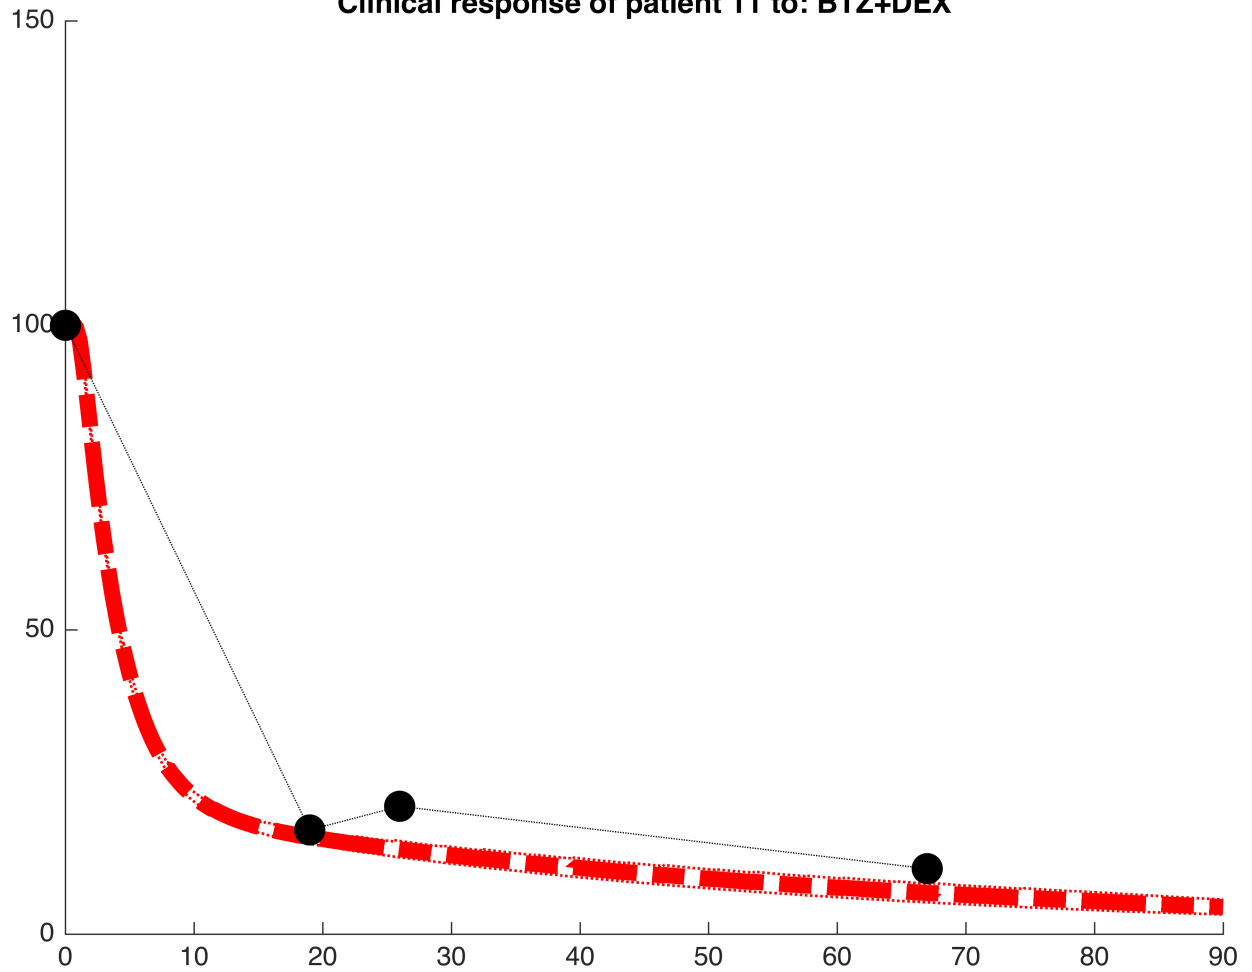

**Clinical response of patient 12 to: LEN+BTZ+DEX**

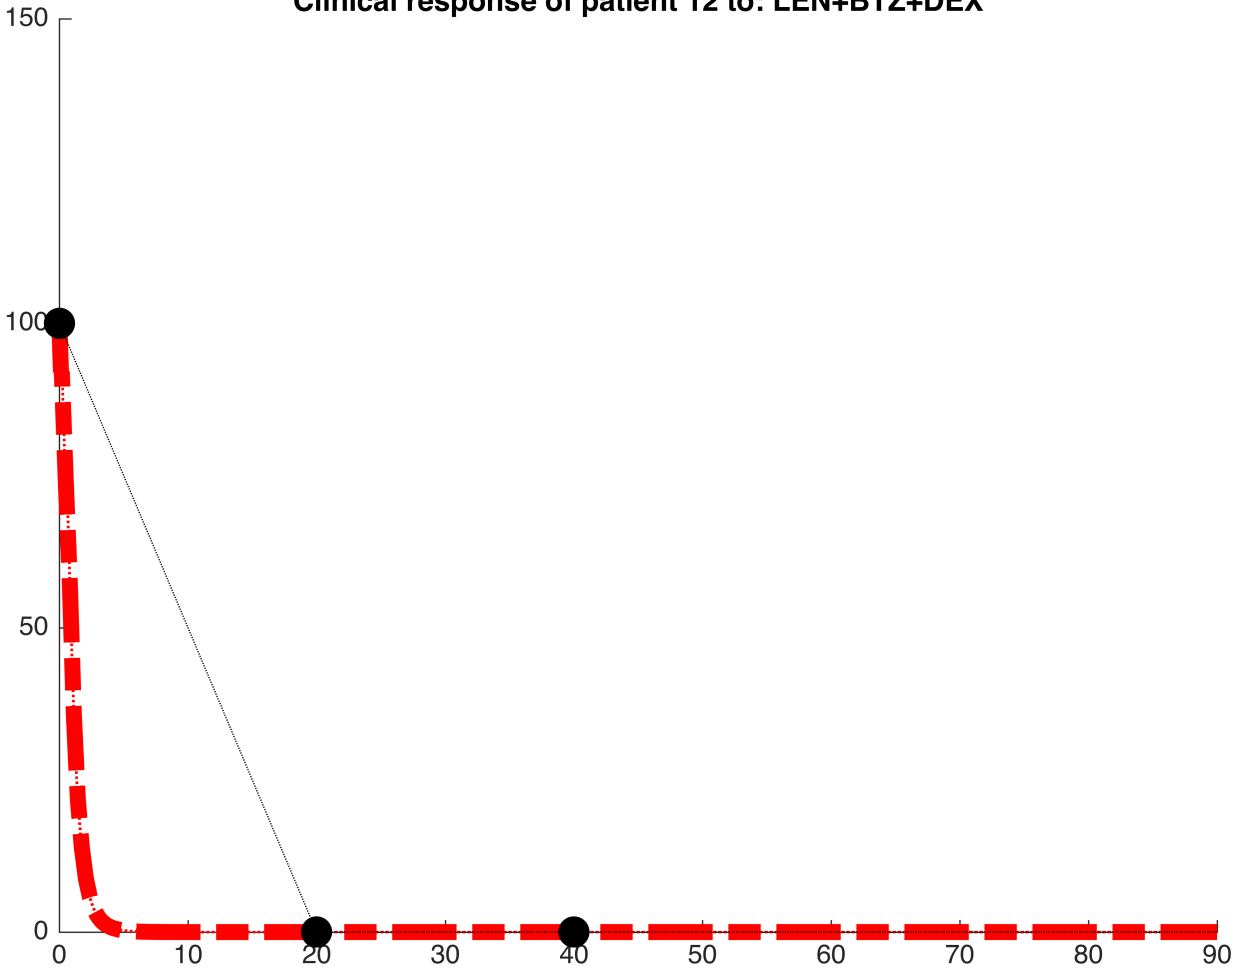

**Clinical response of patient 14 to: LEN+BTZ+DEX**

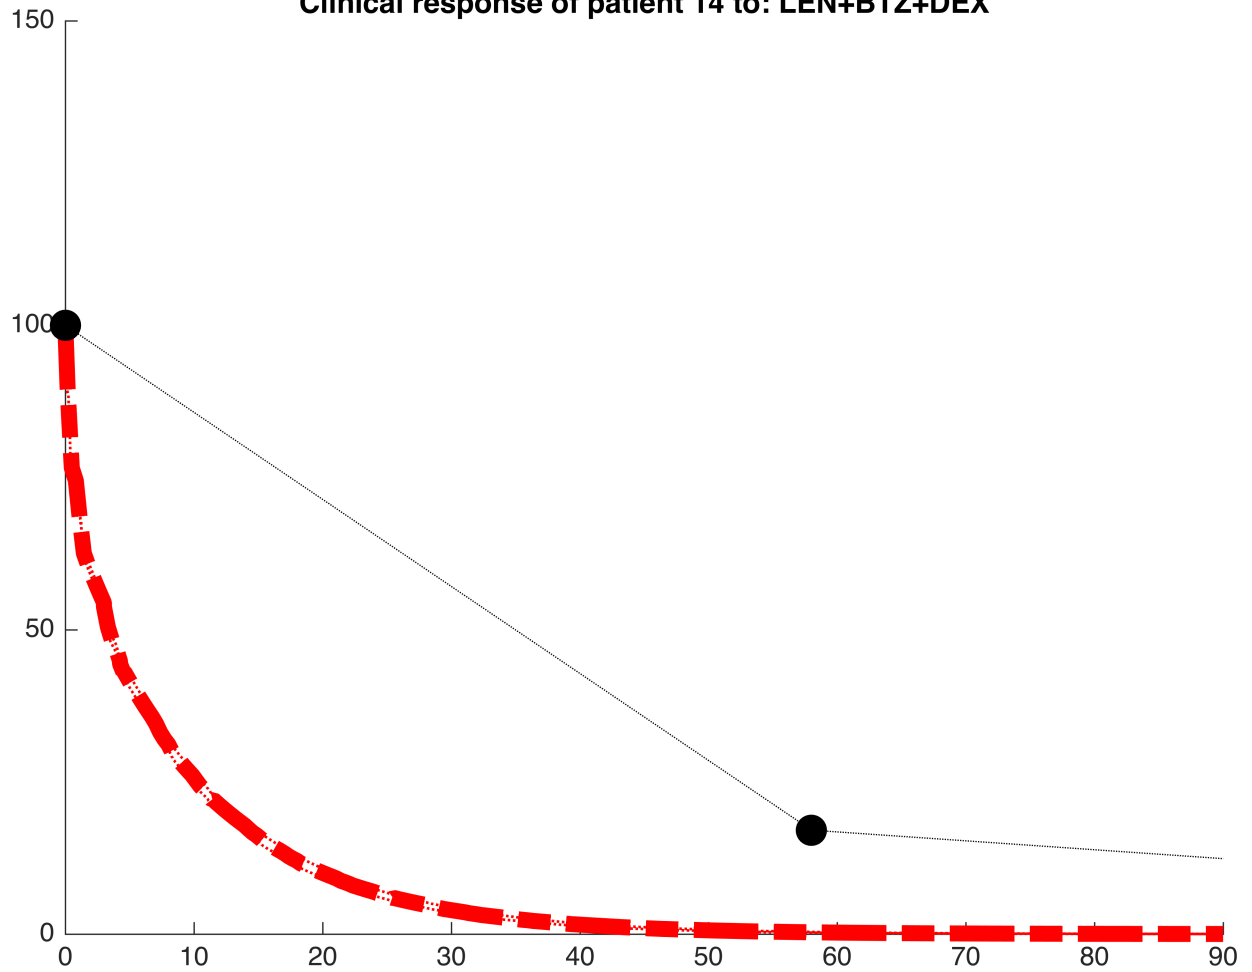

Clinical response of patient 15 to: LEN+BTZ+DEX

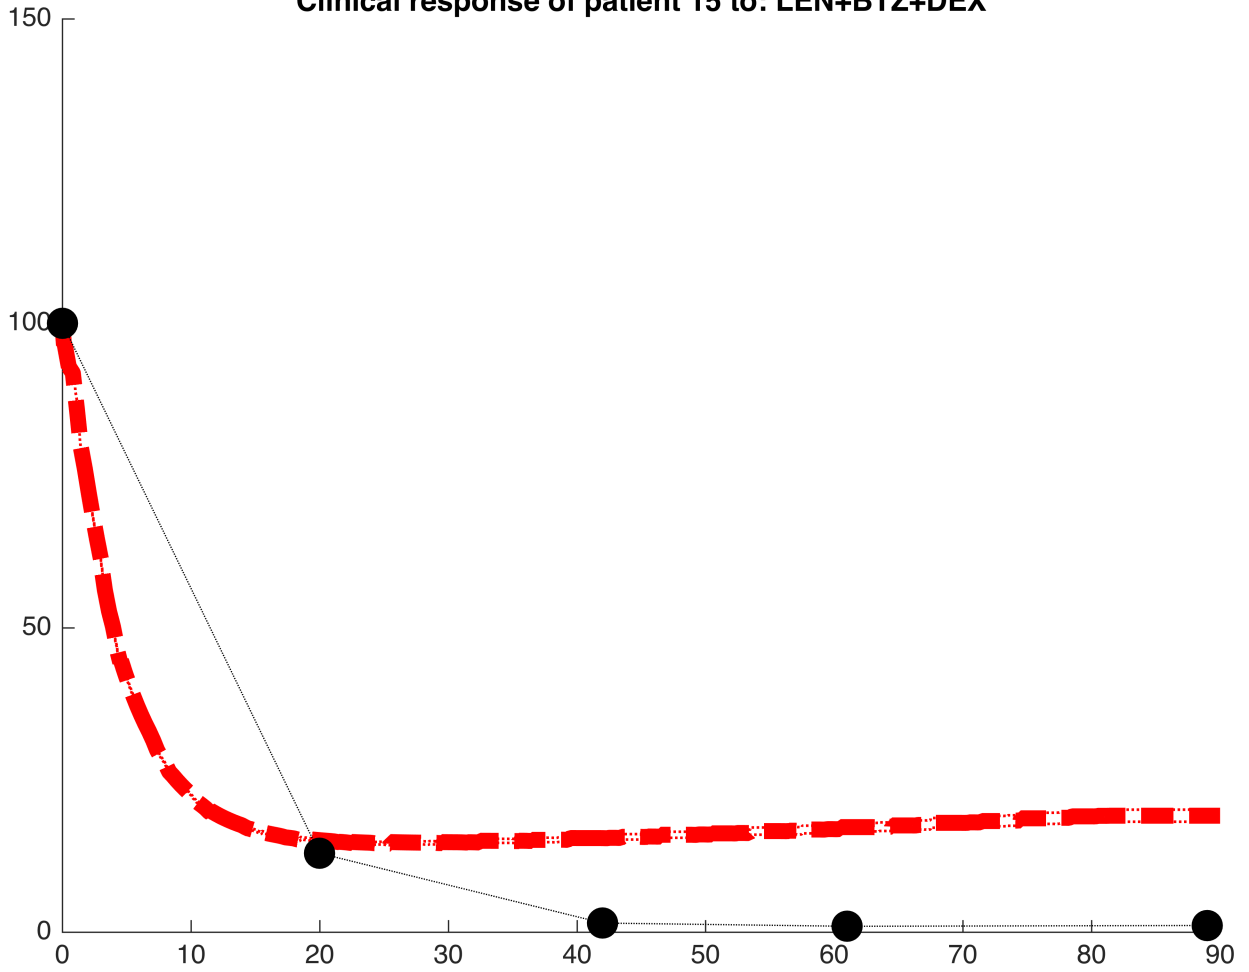

Clinical response of patient Pt18 to: BTZ

Actual treatment: OprDex

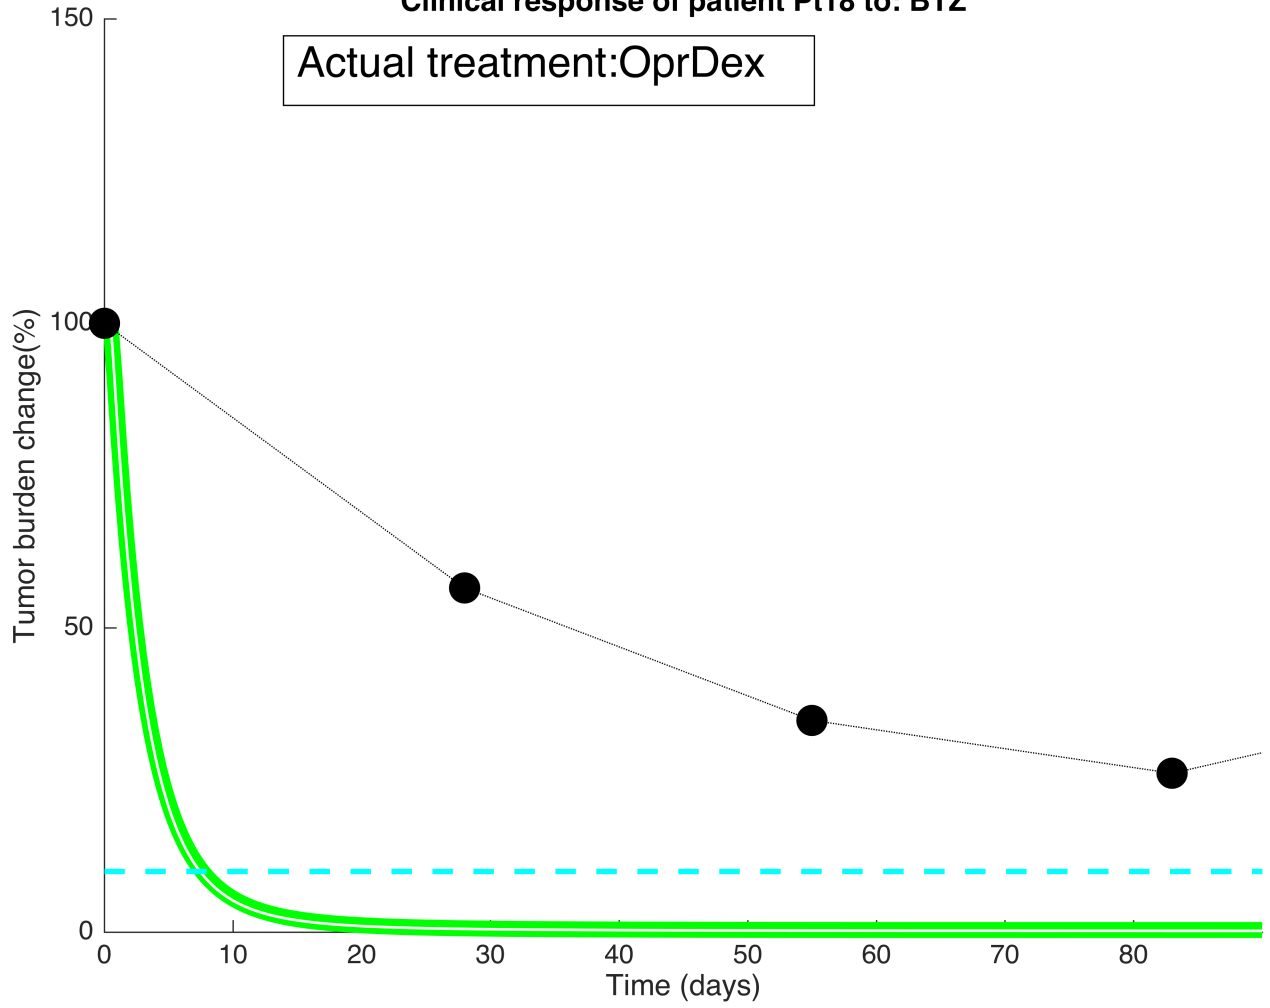

Clinical response of patient 21 to: BTZ+LEN

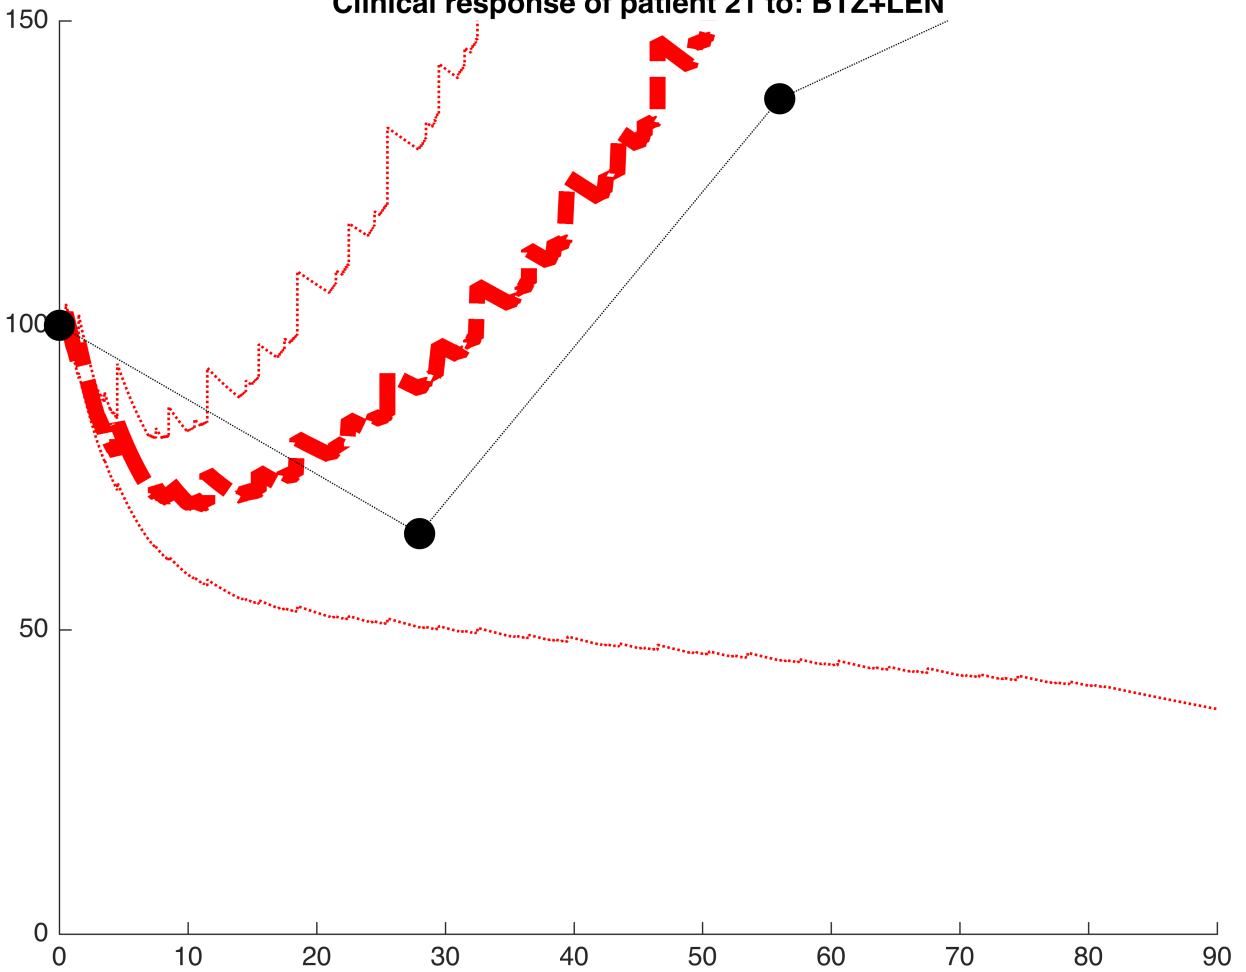

Clinical response of patient 24 to: LEN+BTZ+DEX

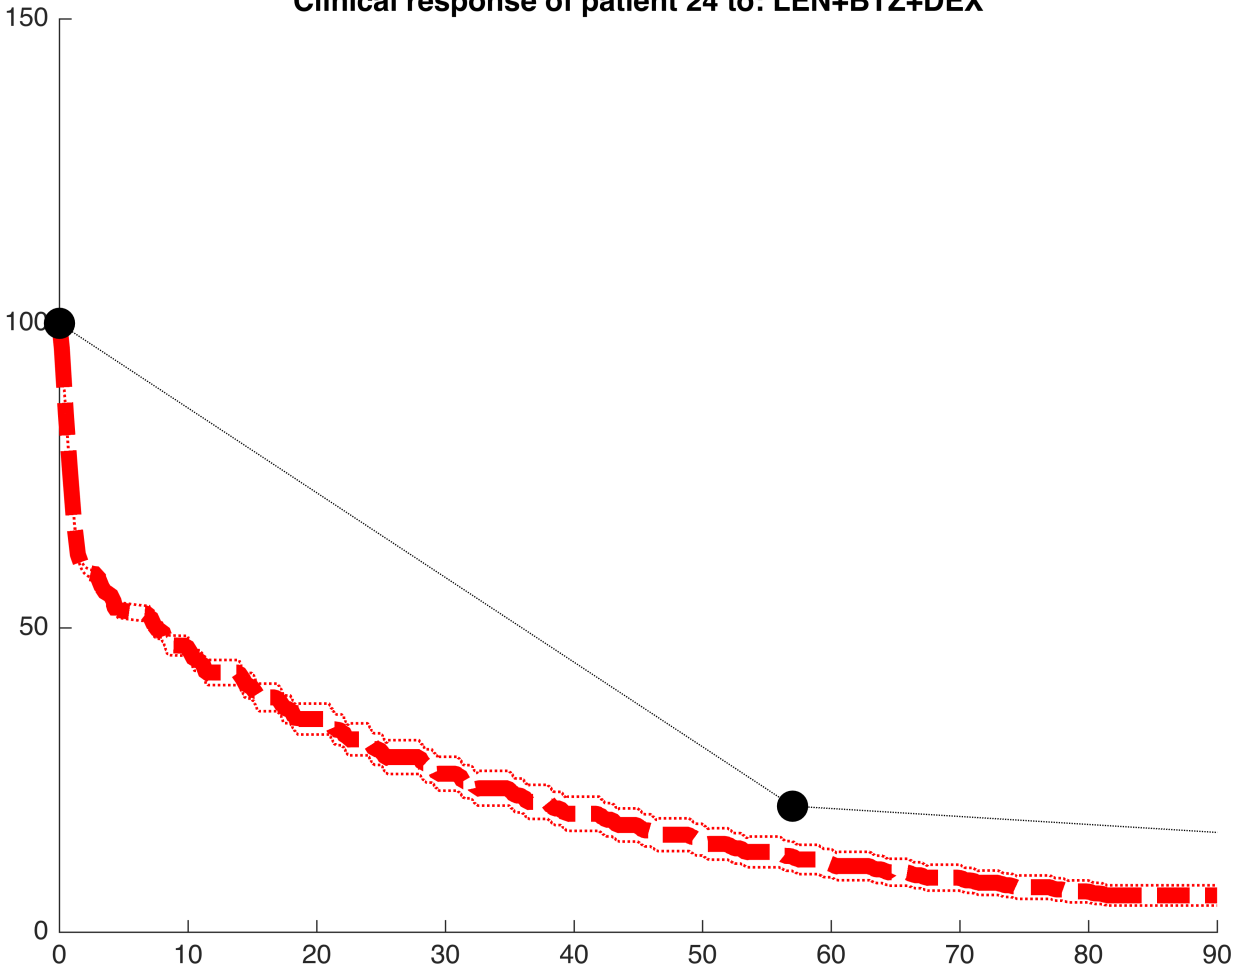

Clinical response of patient 27 to: POM+BTZ+DEX

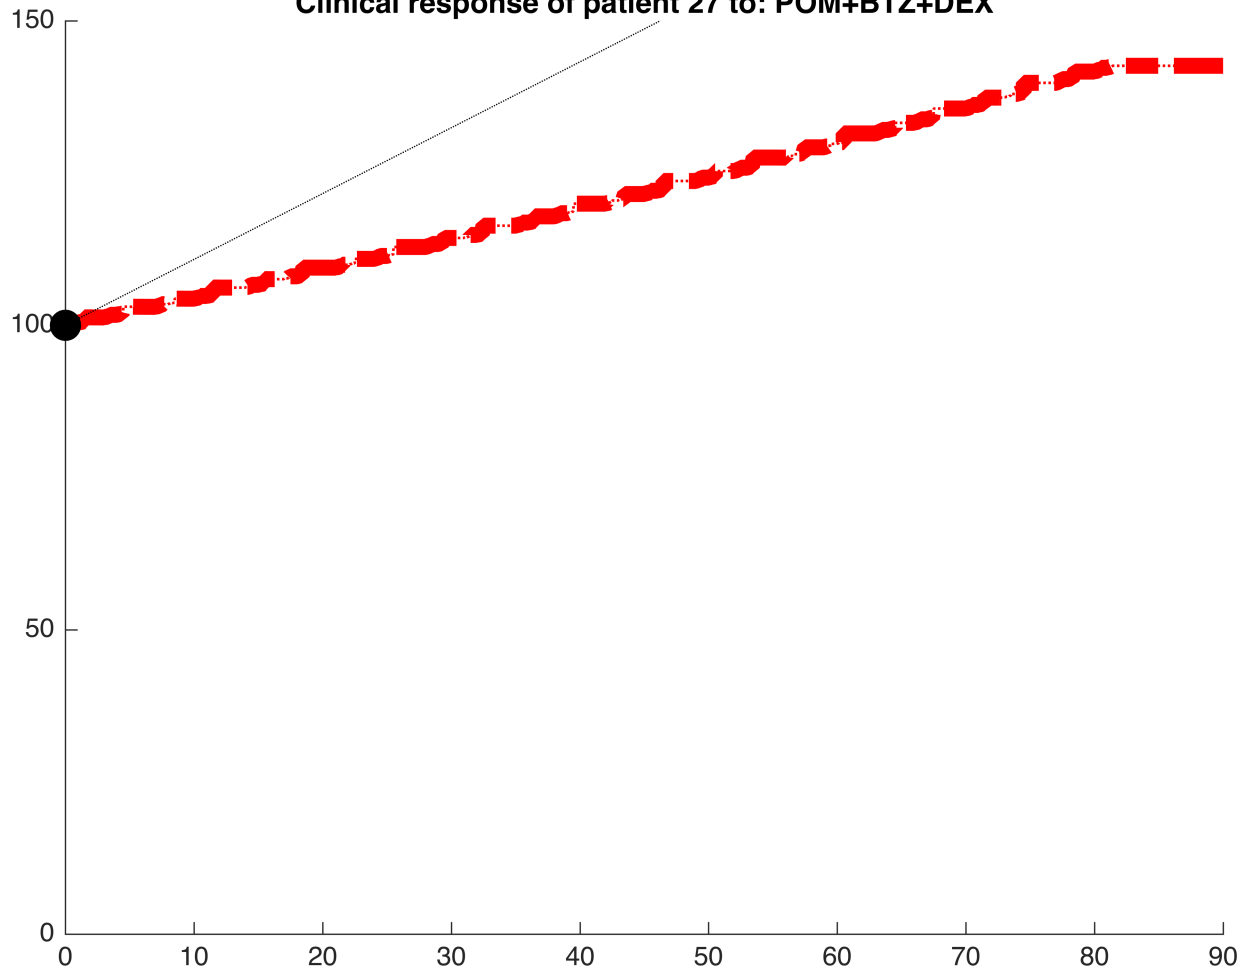



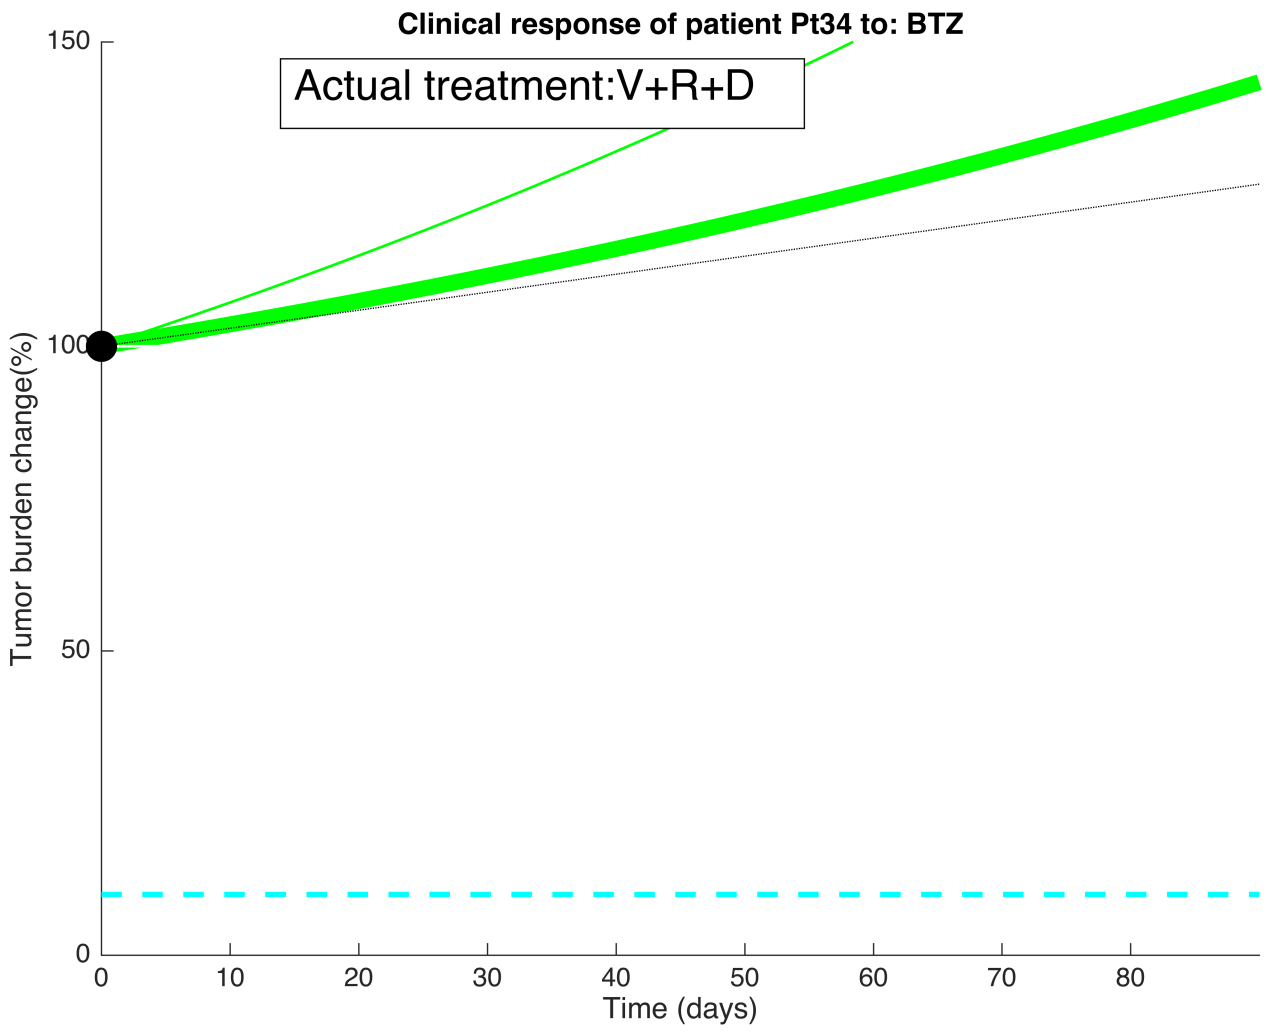

Clinical response of patient 36 to: CRM1i+DOXIL

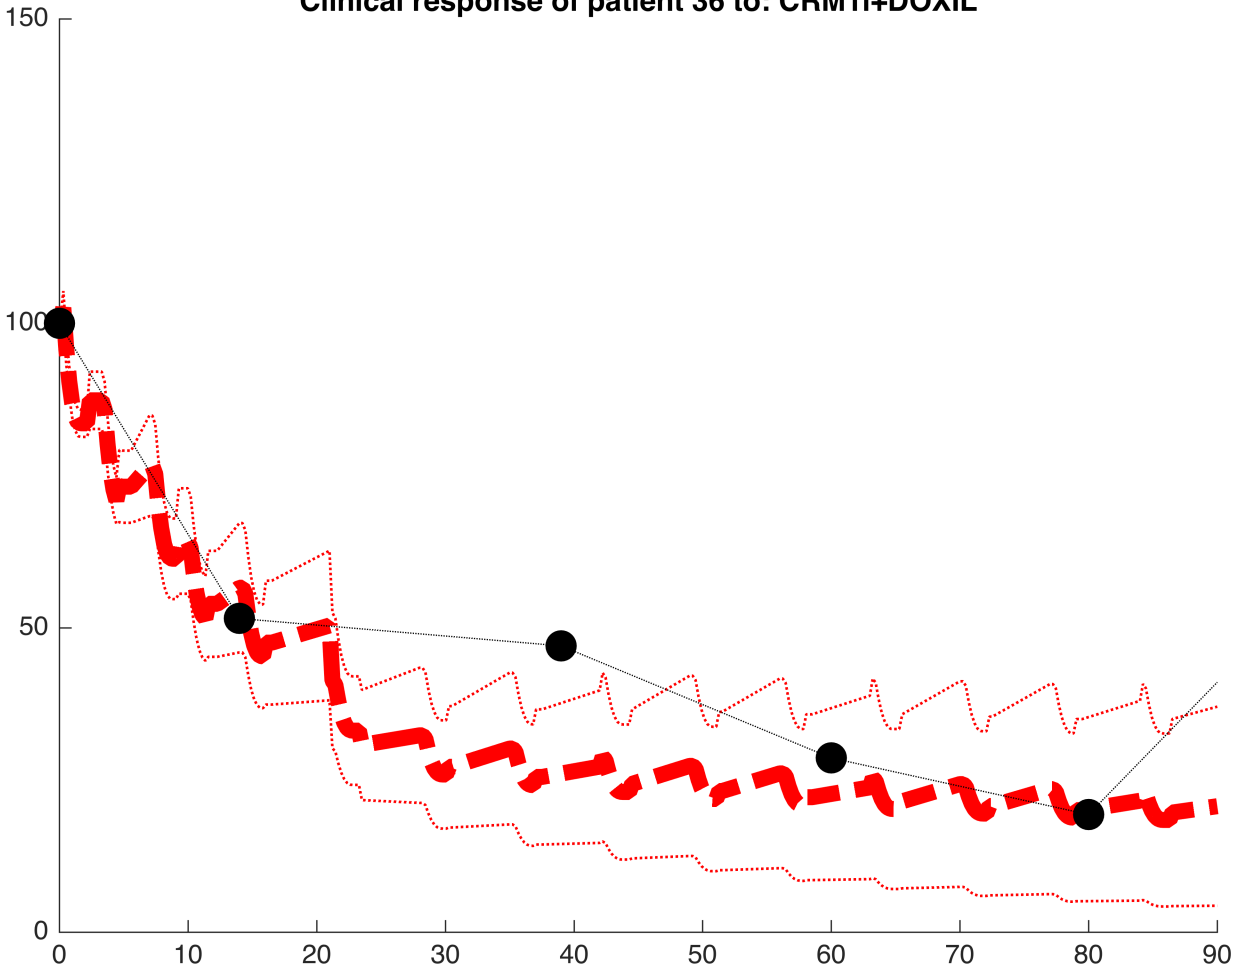

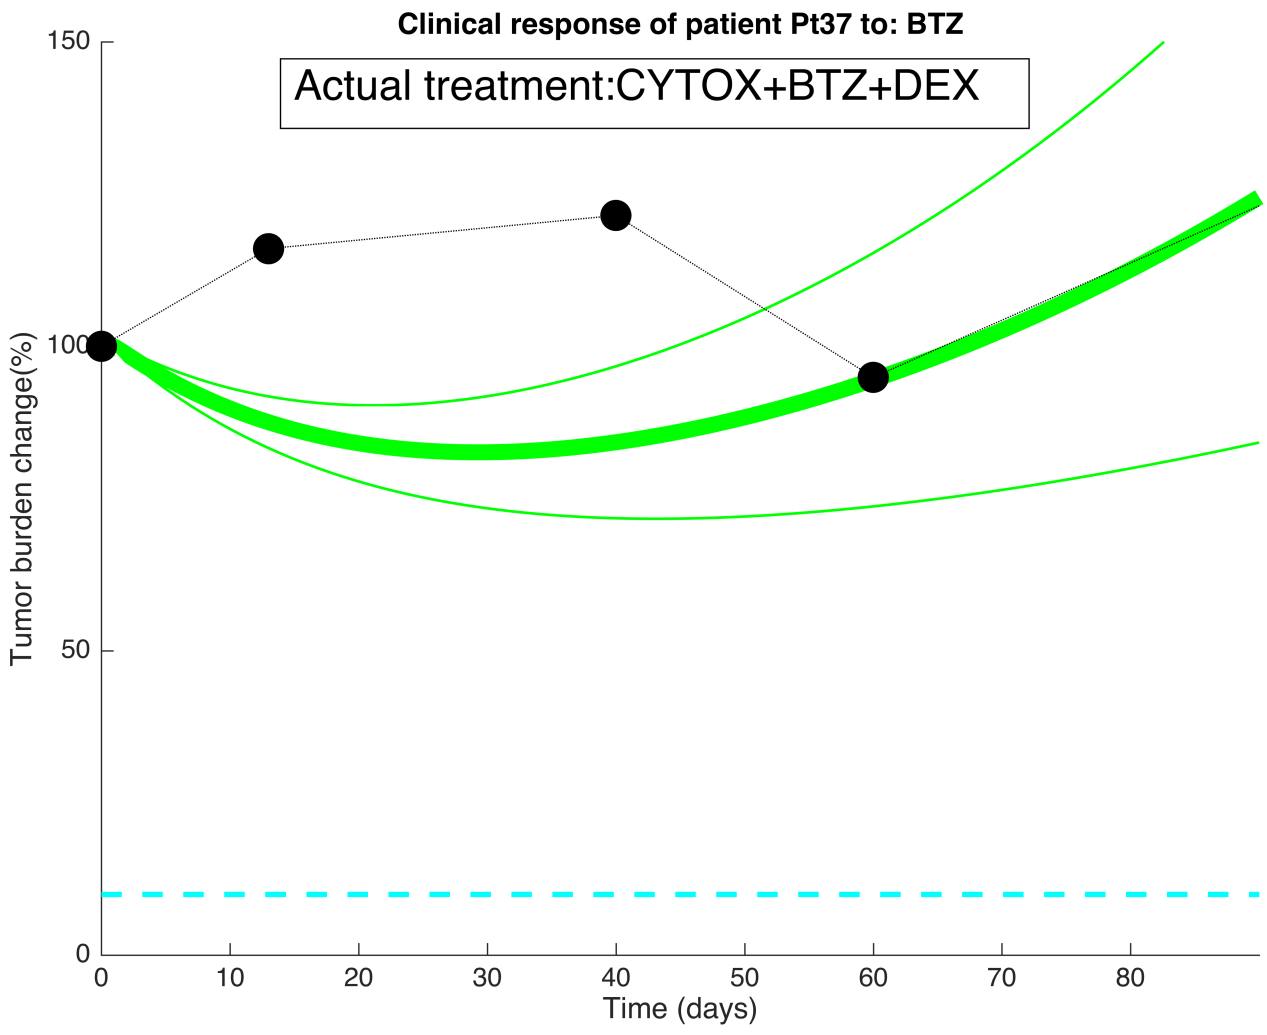

Clinical response of patient 39 to: CRM1i+DOXIL

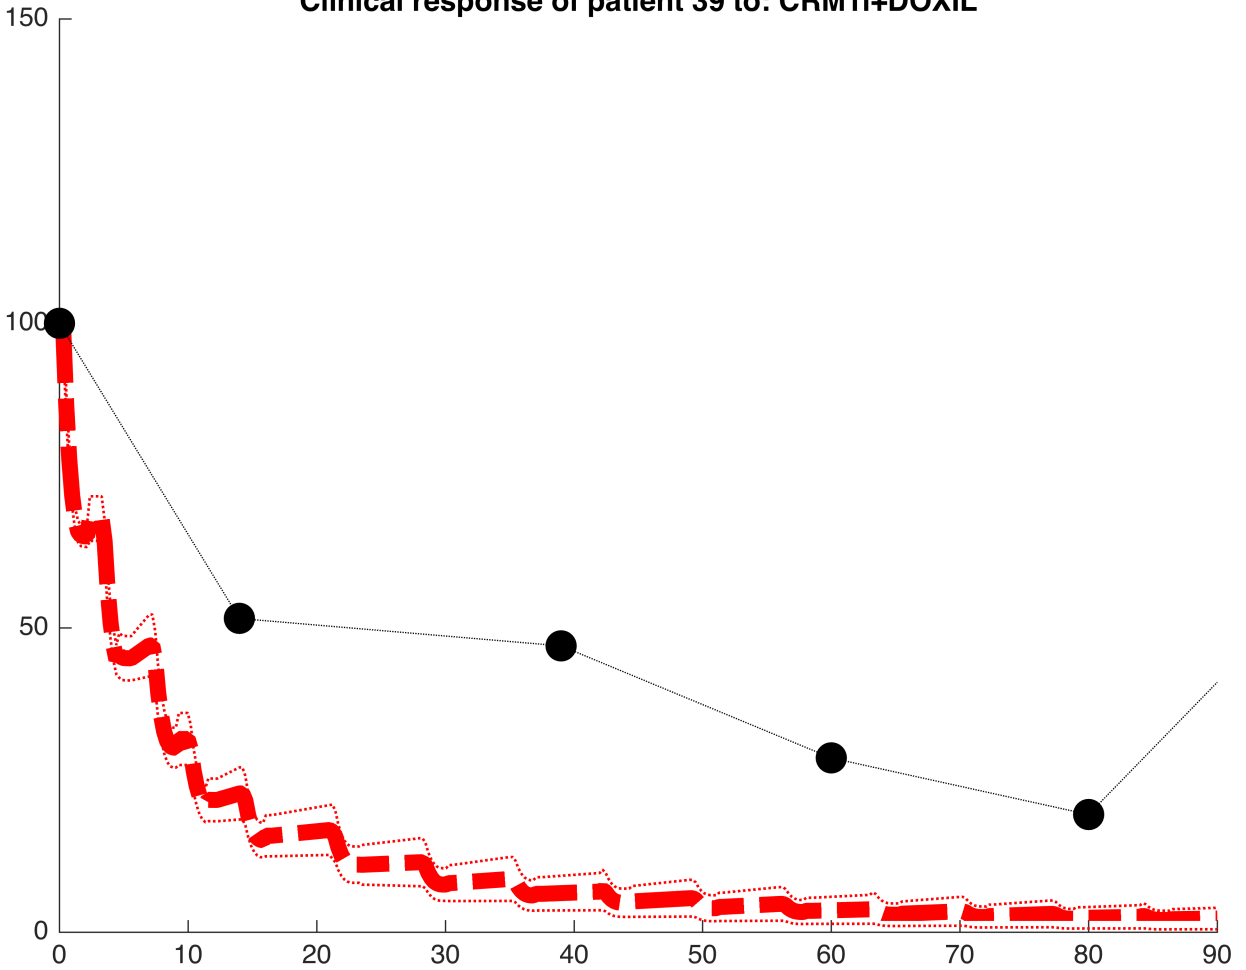

Clinical response of patient Pt47 to: BTZ

Actual treatment:VD

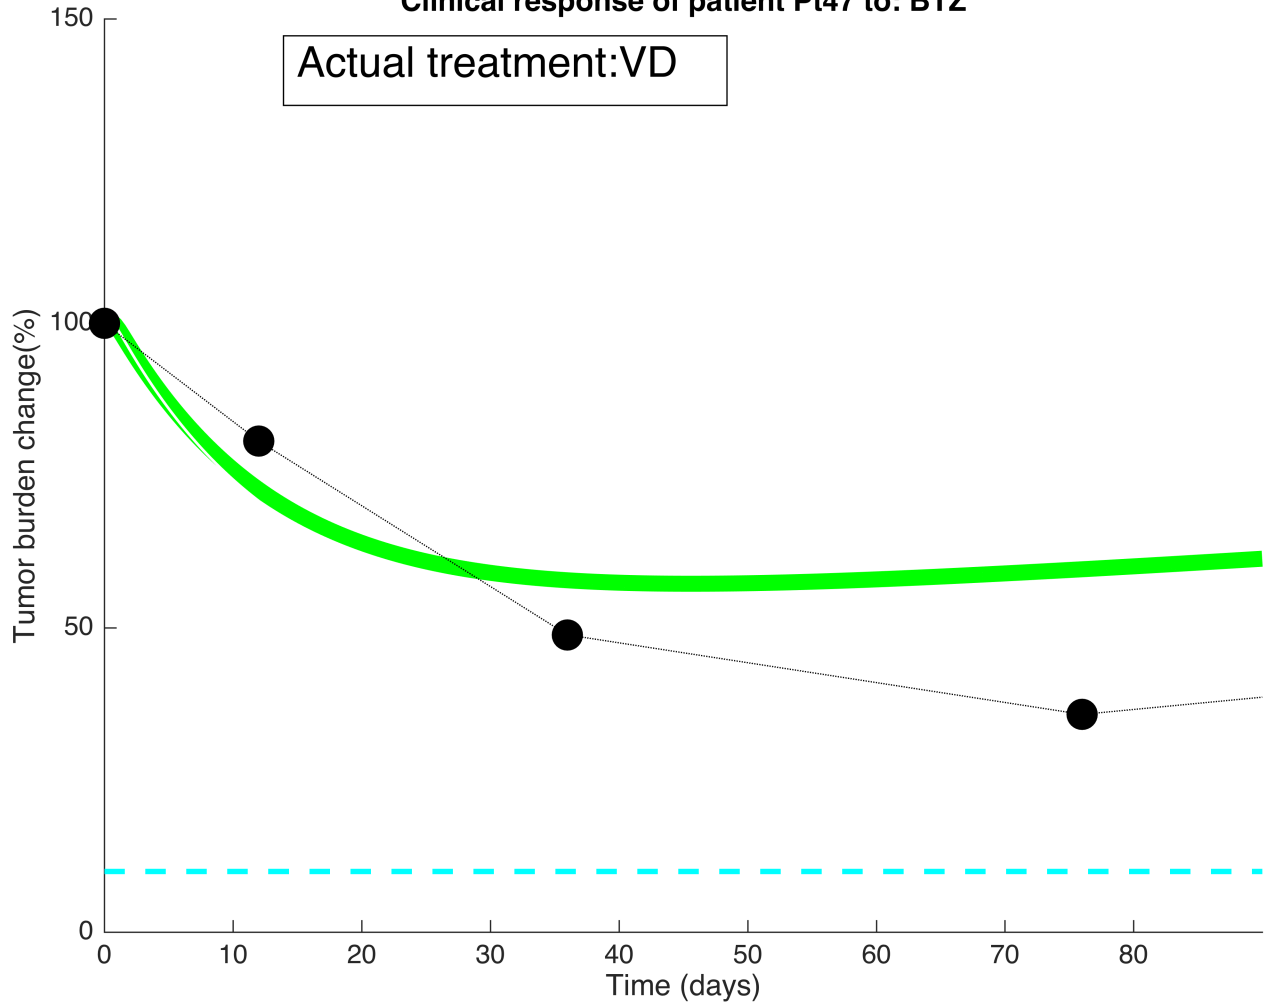

Clinical response of patient 51 to: CRM1i+DOXIL

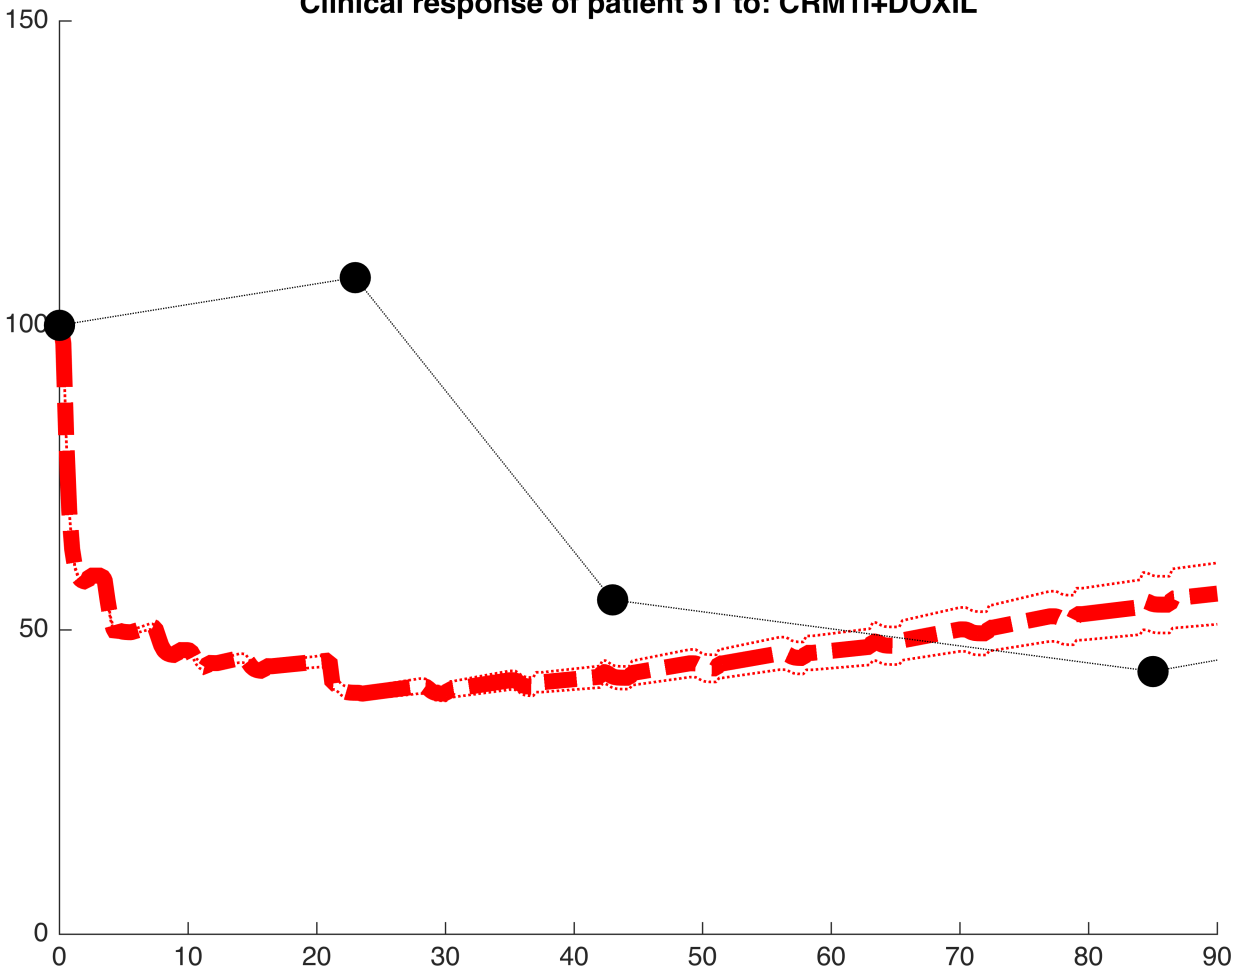

Clinical response of patient 53 to: CRM1i+DOXIL

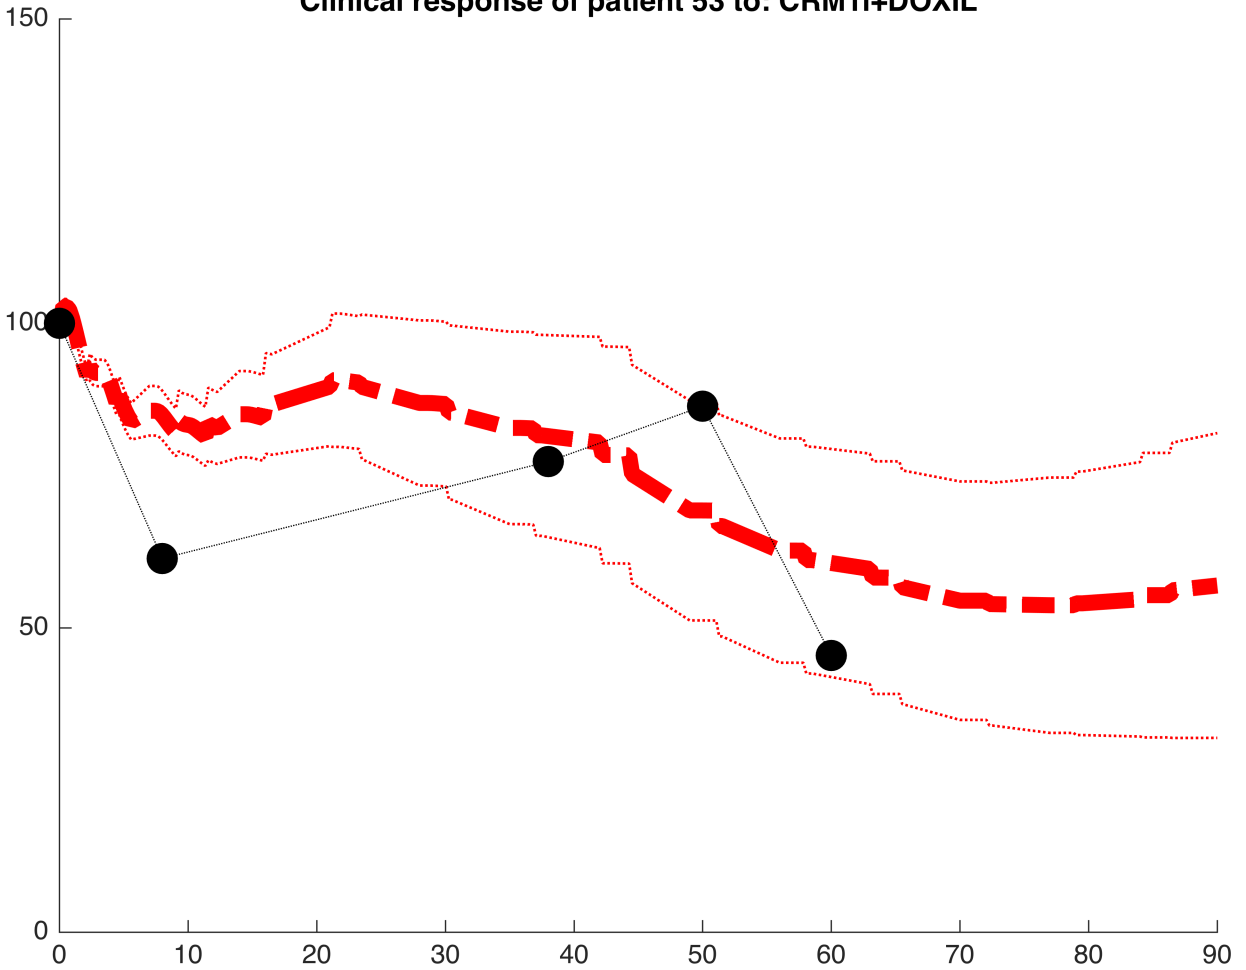

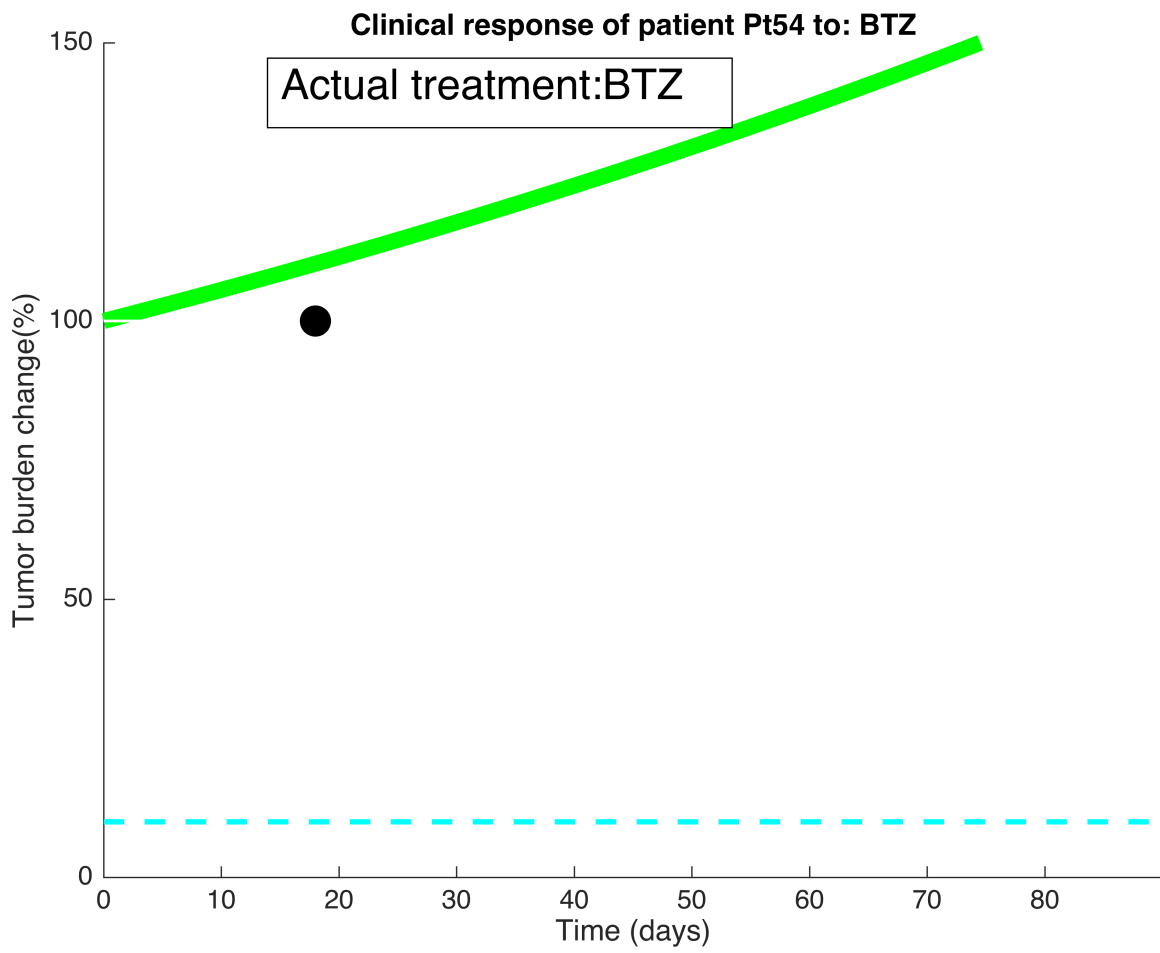



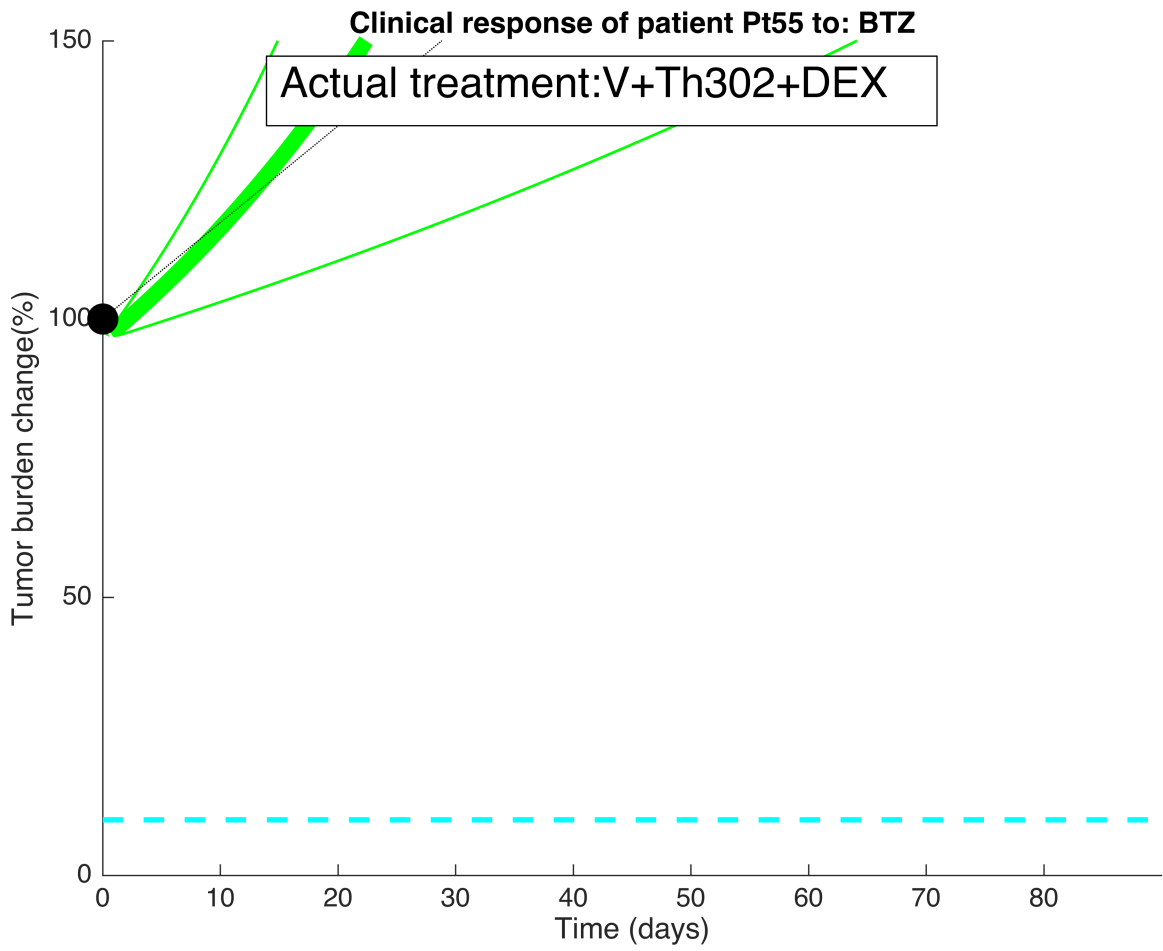

Clinical response of patient Pt56 to: BTZ

Actual treatment: OPR+DEX

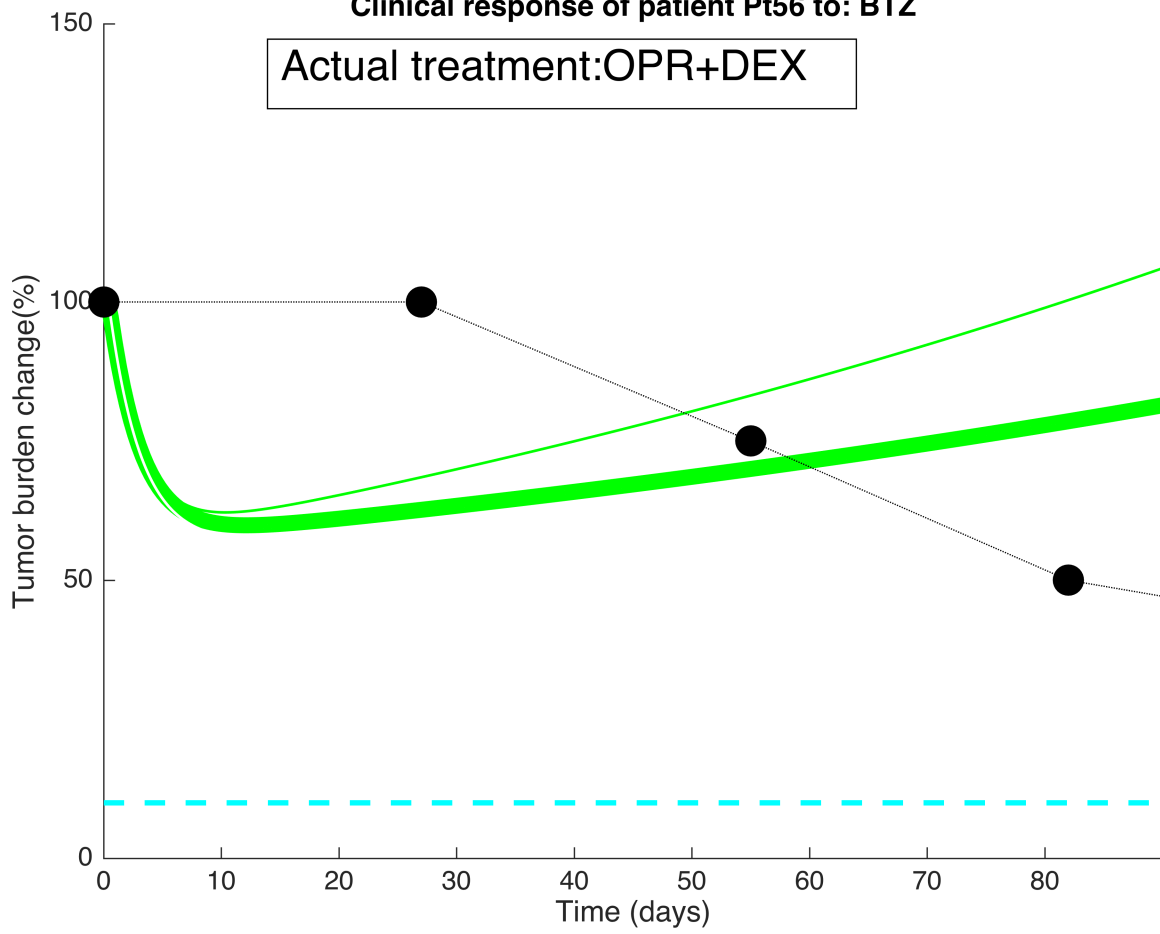

Clinical response of patient 57 to: CRM1i+DOXIL

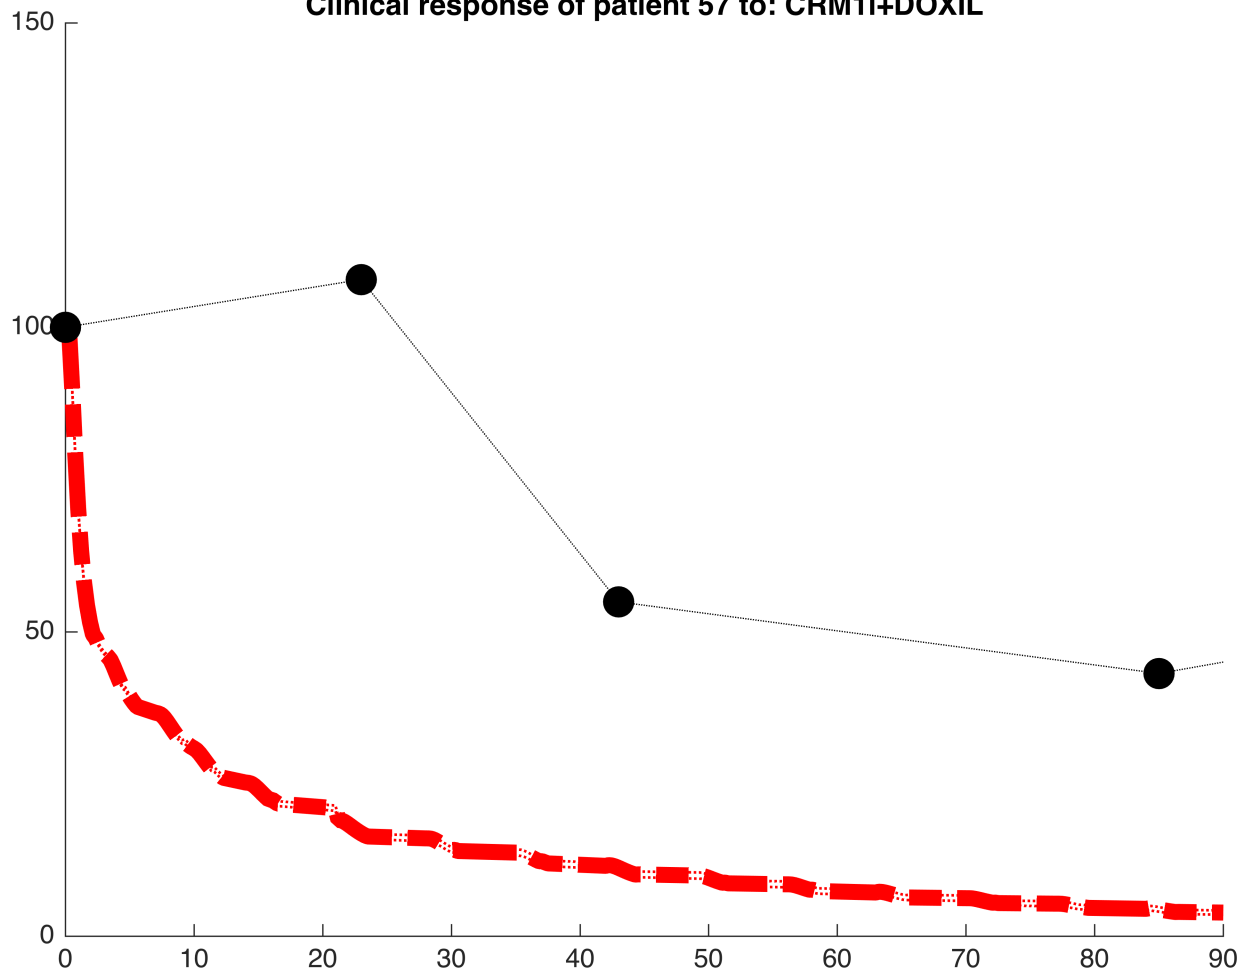

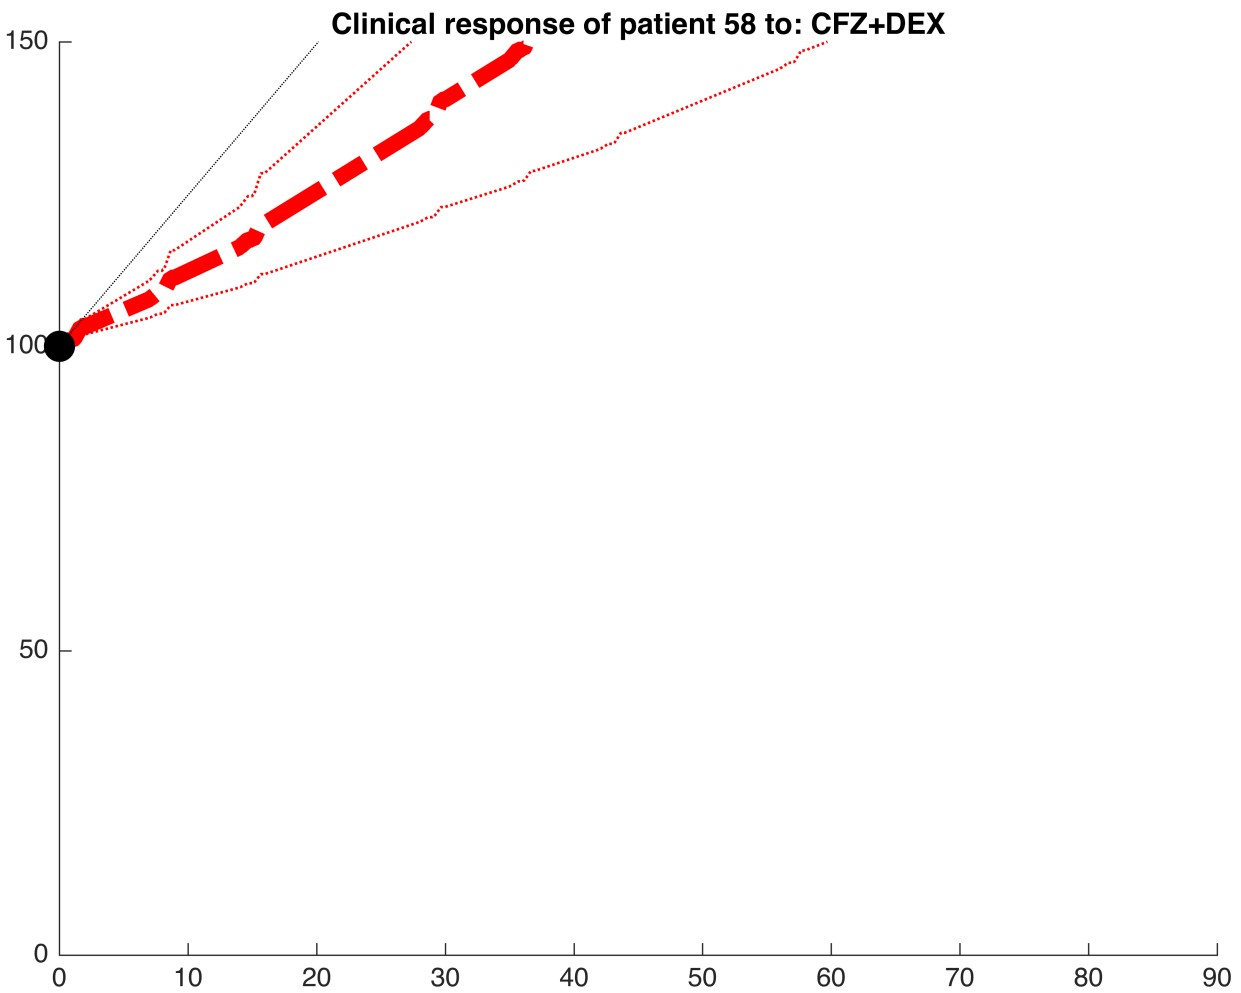

Clinical response of patient 59 to: CRM1i+DOXIL

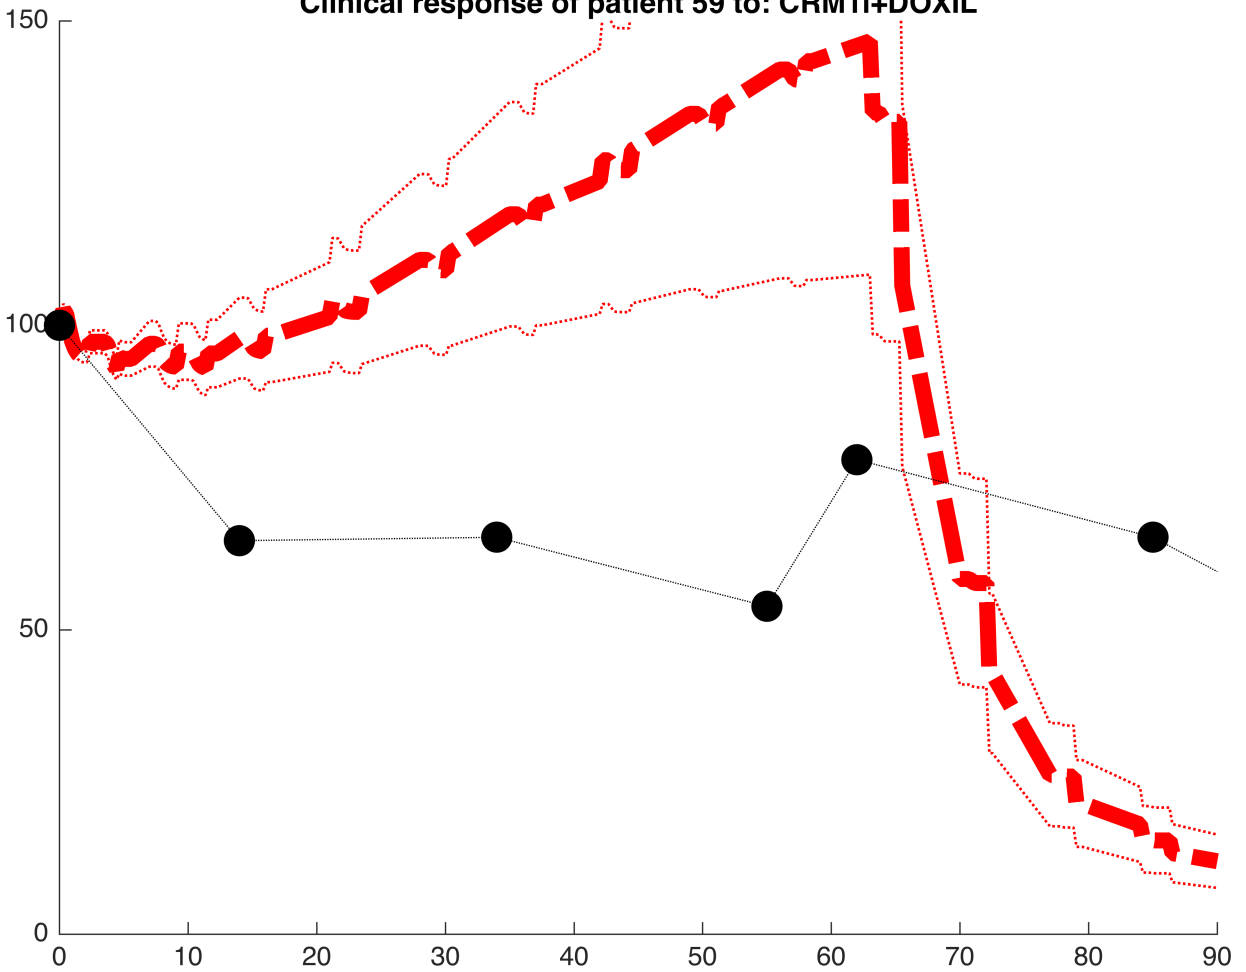

Clinical response of patient Pt64 to: BTZ

Actual treatment:NA

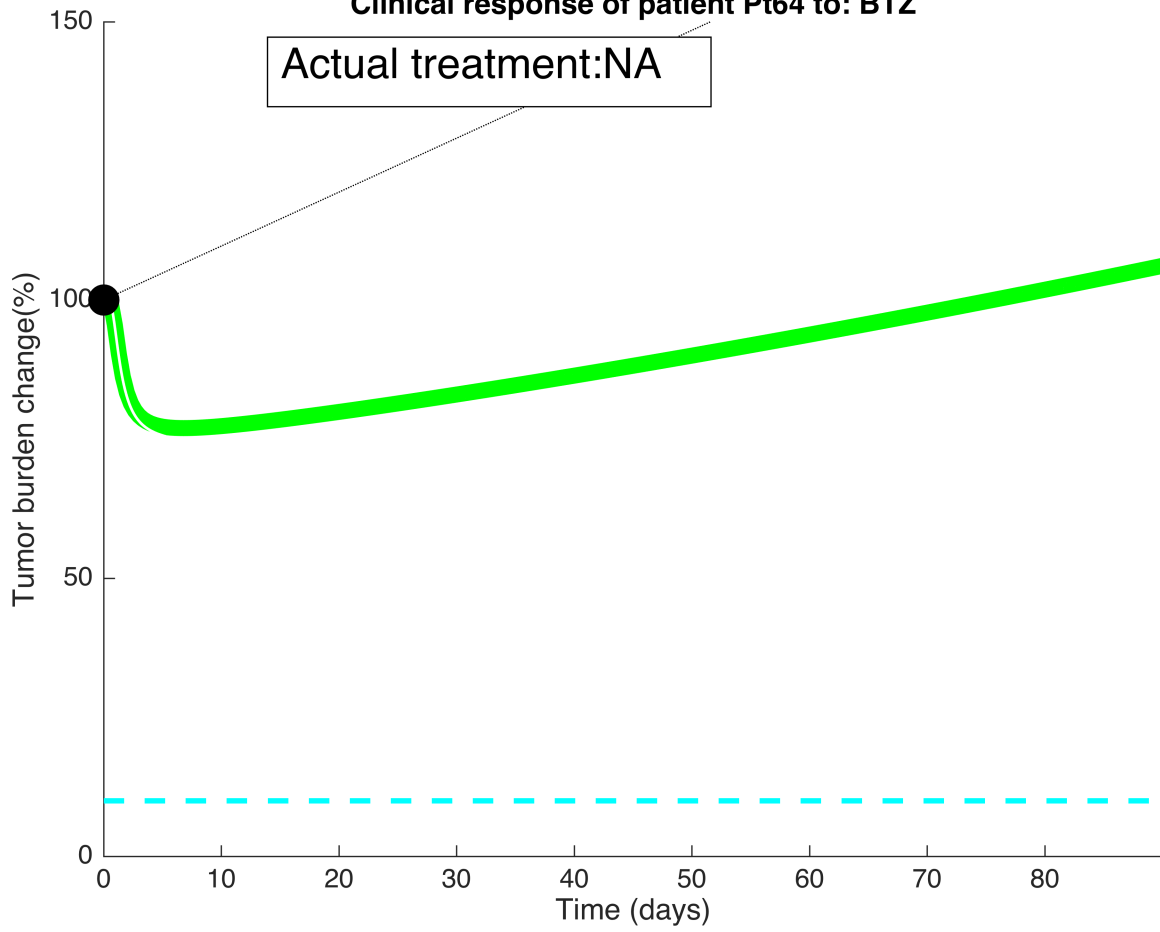

Clinical response of patient 68 to: CRM1i+DOXIL

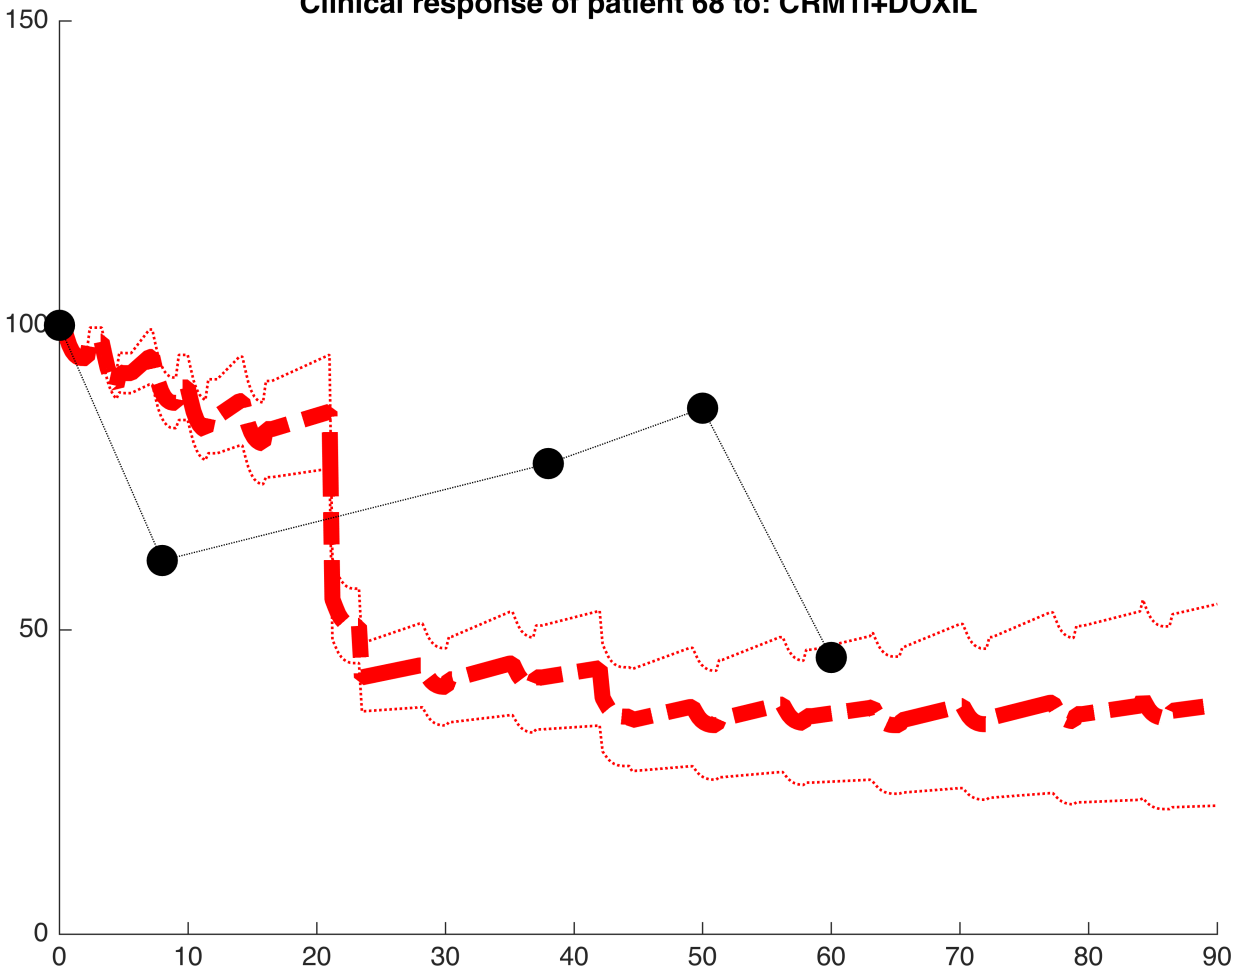

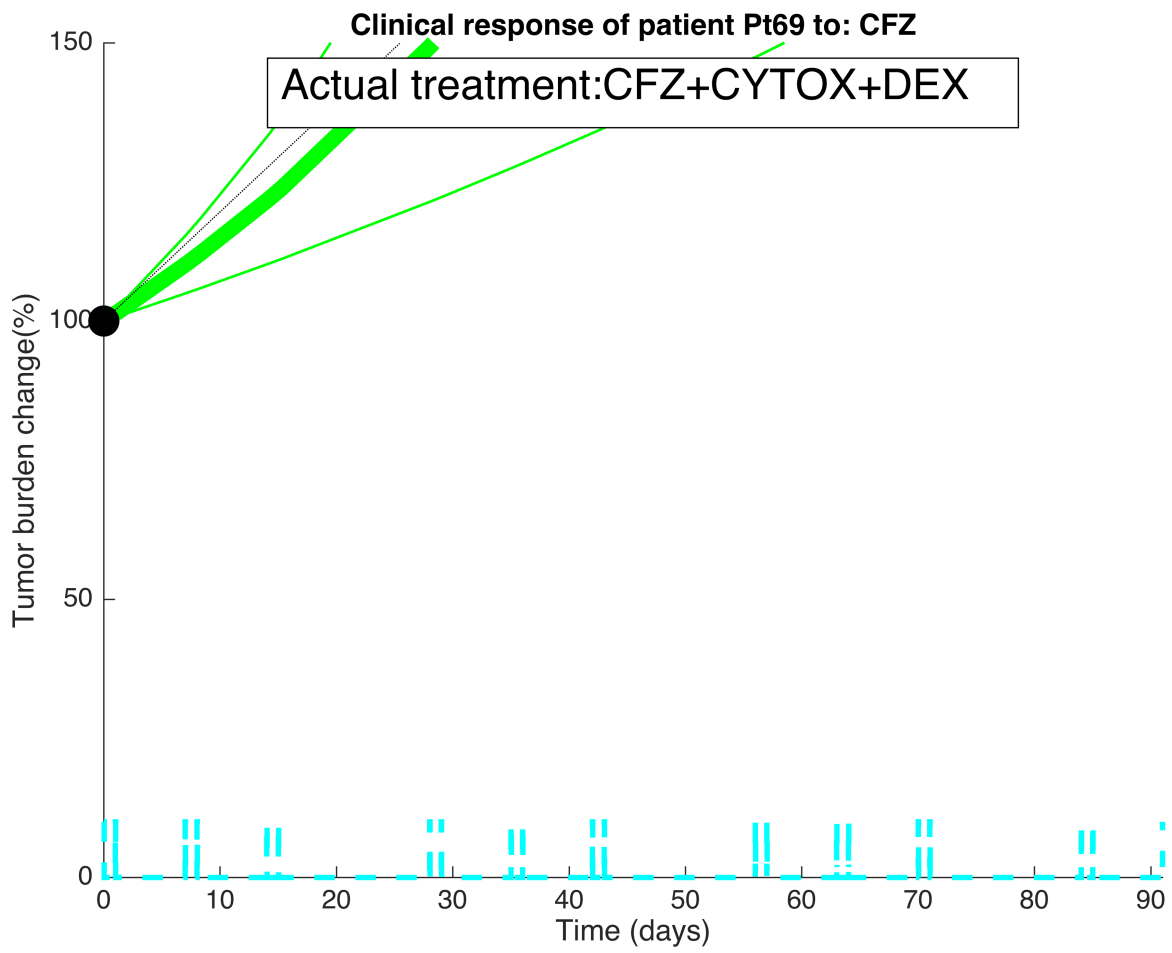



Clinical response of patient 71 to: CRM1i+DOXIL

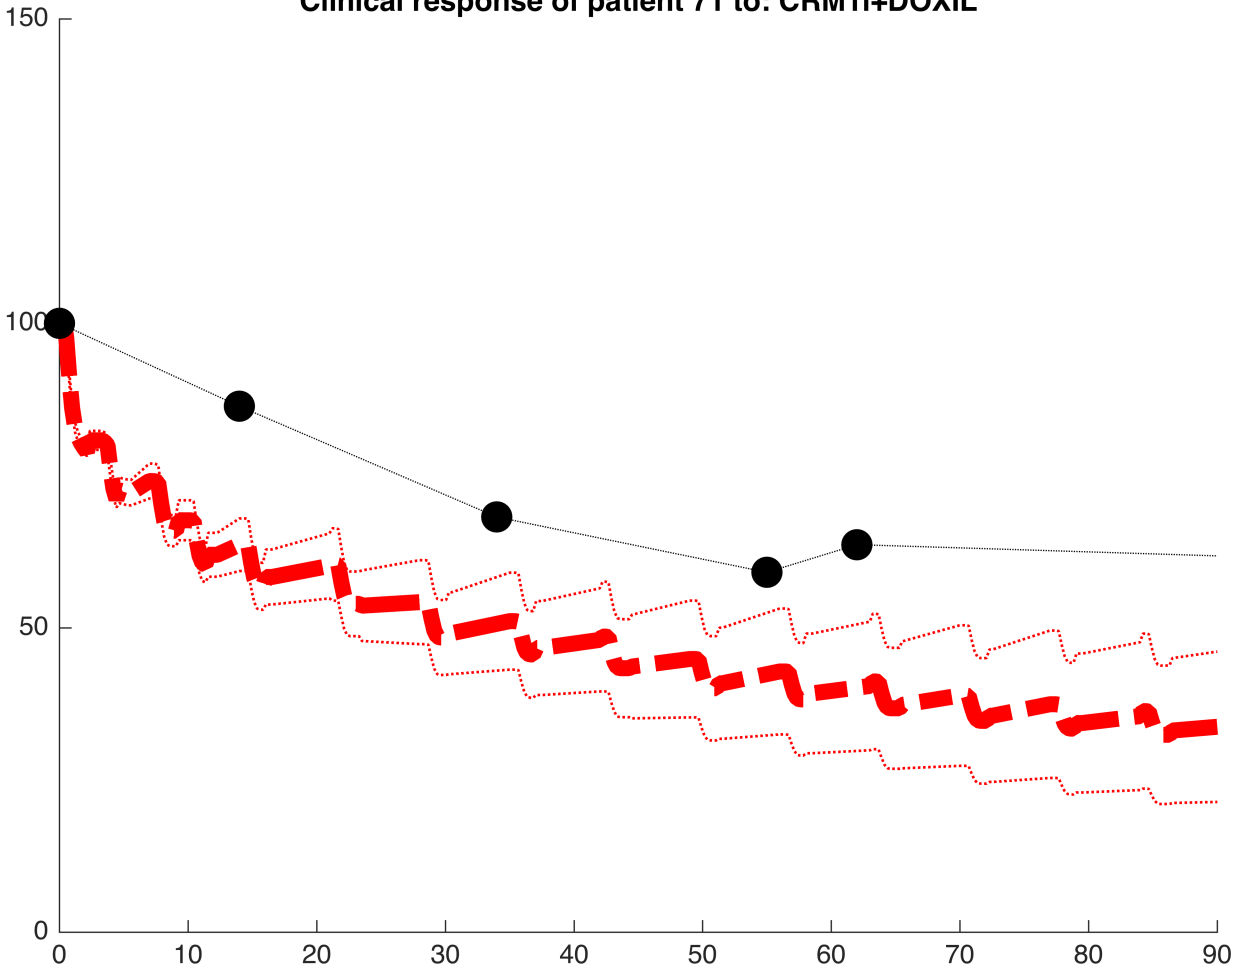

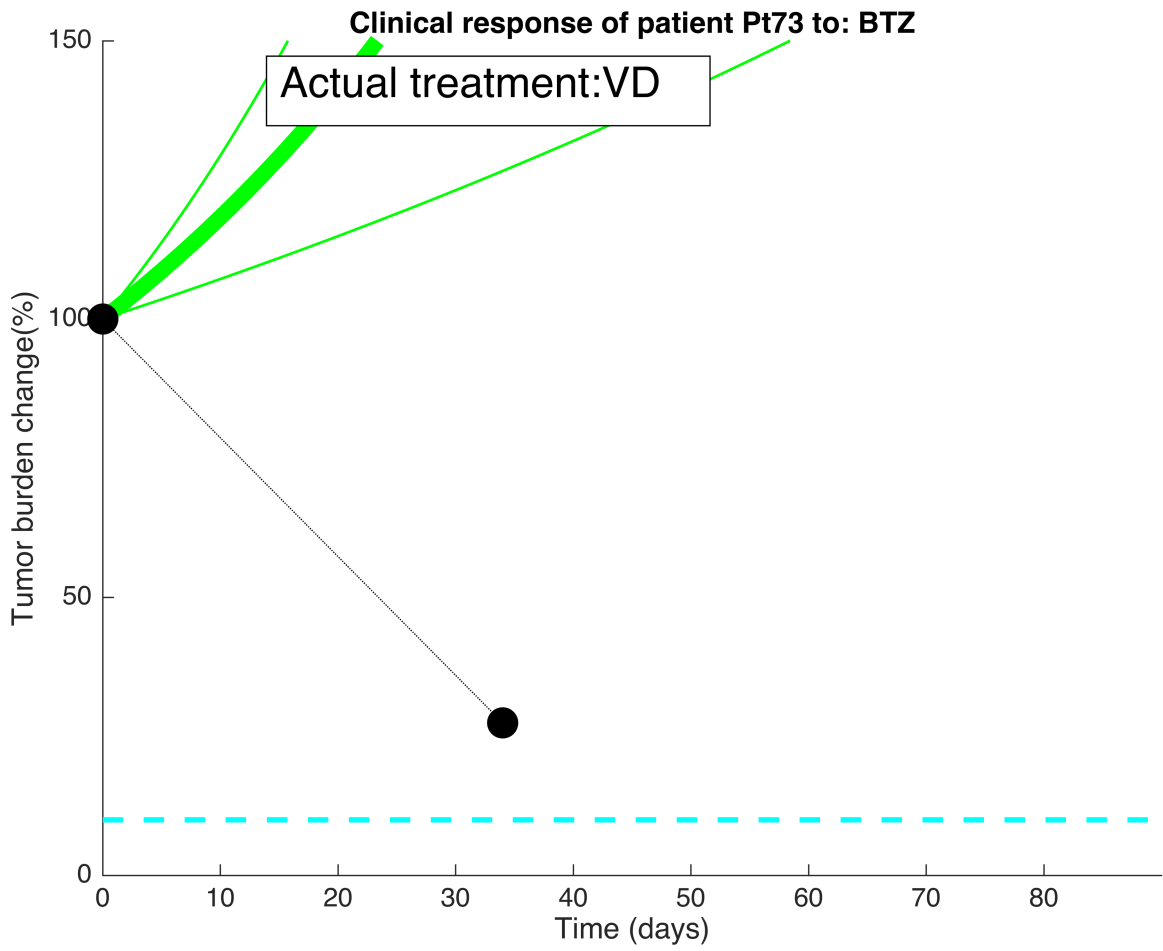

Clinical response of patient 74 to: CFZ+POM

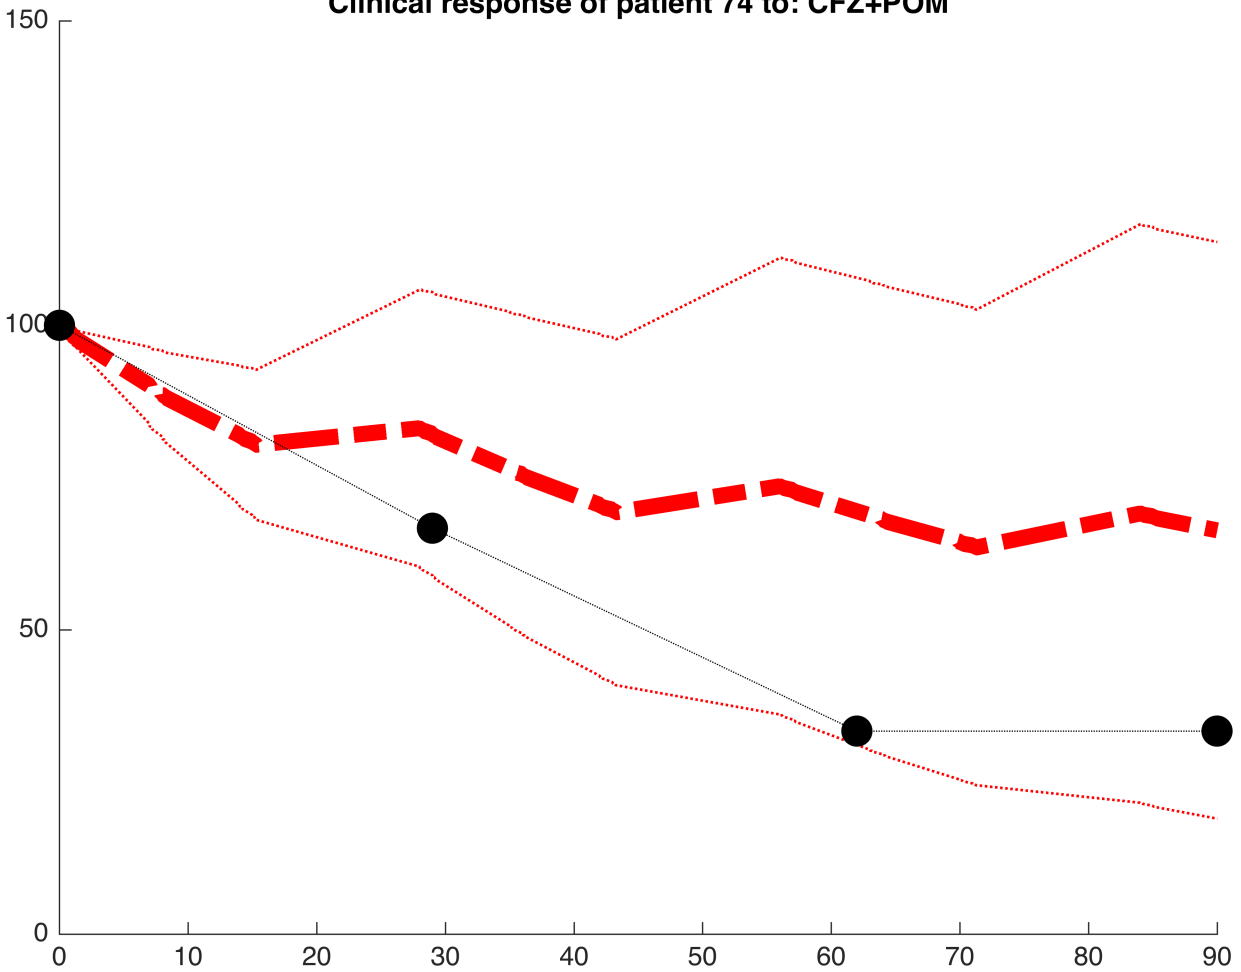

Clinical response of patient Pt78 to: BTZ

Actual treatment: VD+TH302

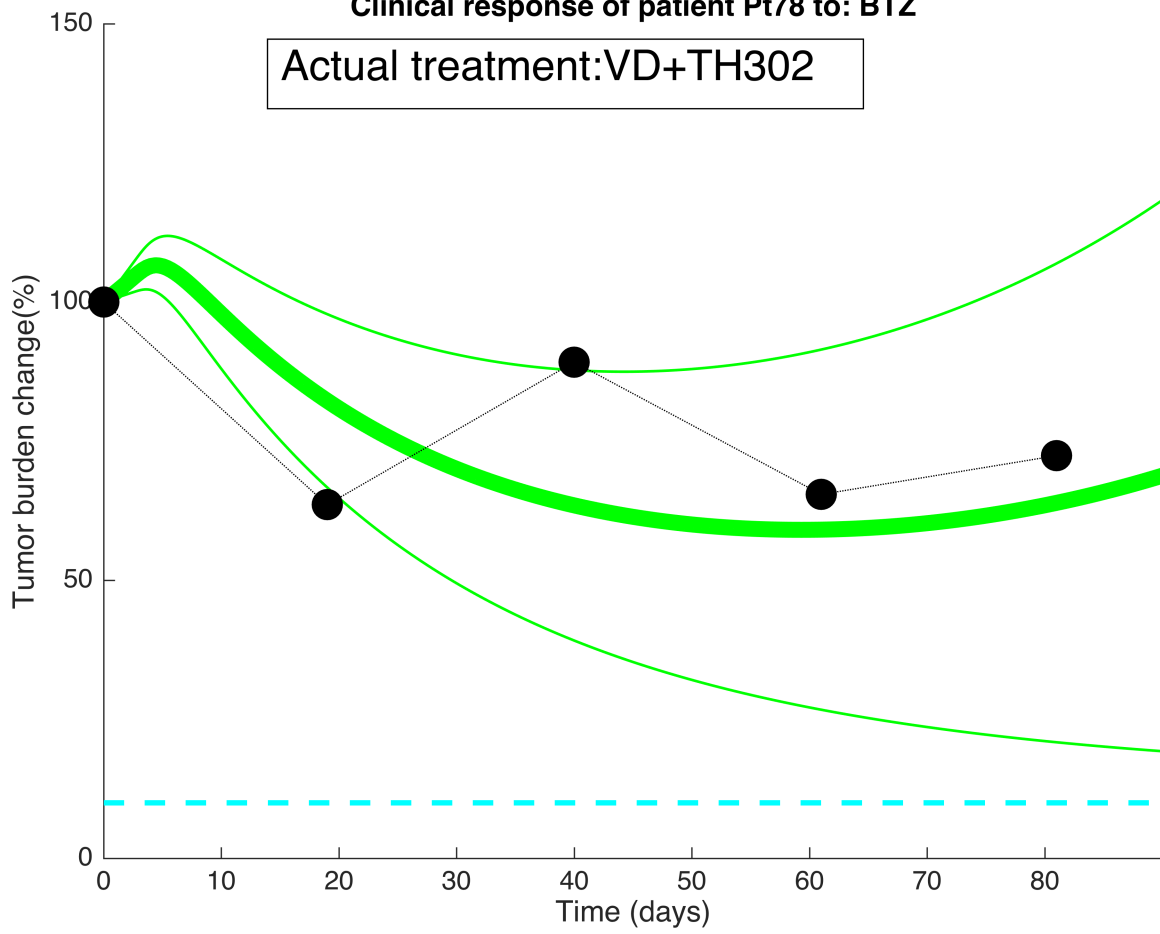

Clinical response of patient 84 to: CRM1i+DOXIL

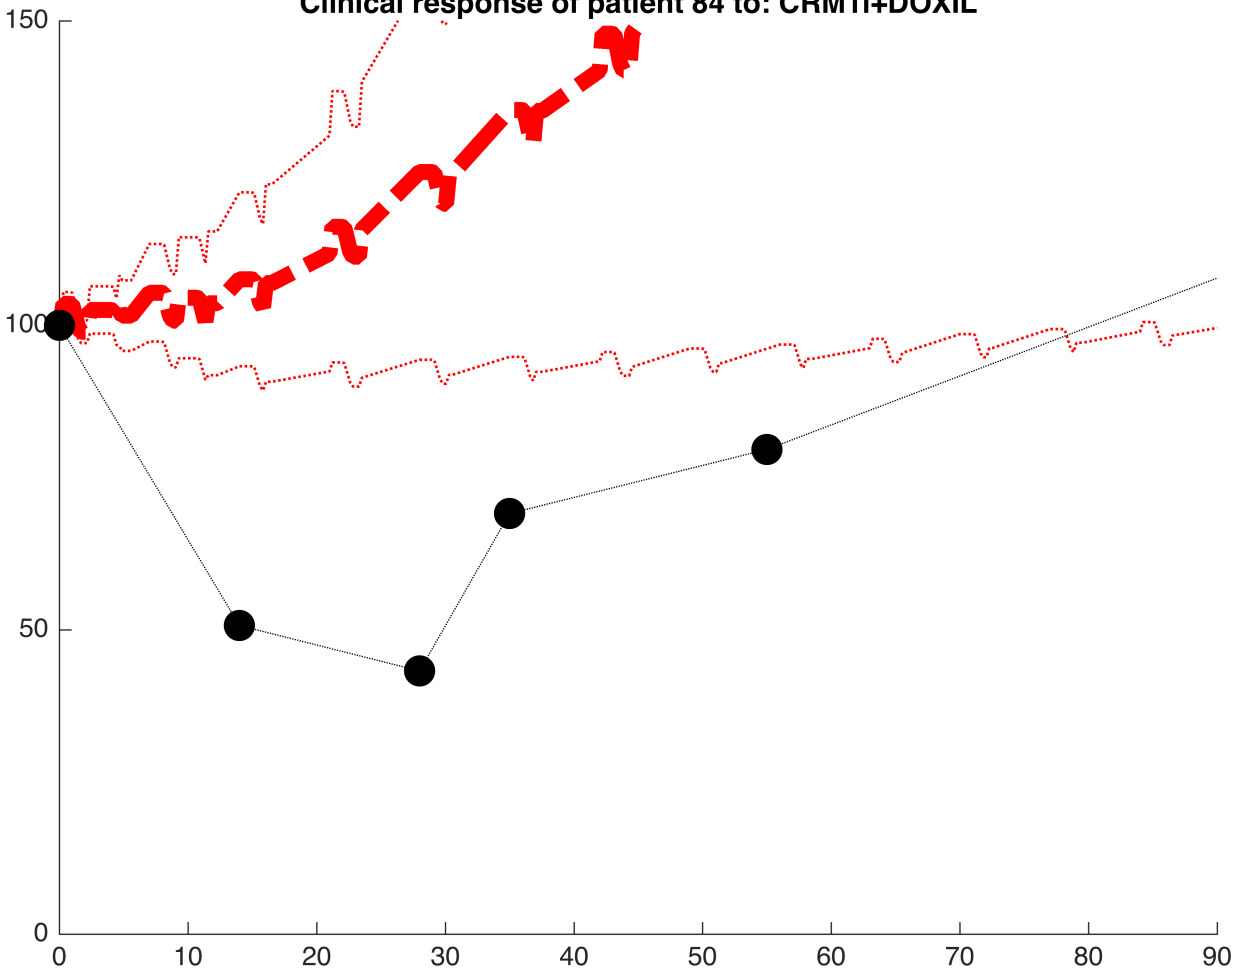

**Clinical response of patient Pt87 to: BTZ**

**Actual treatment: Oprozomib+DEX**

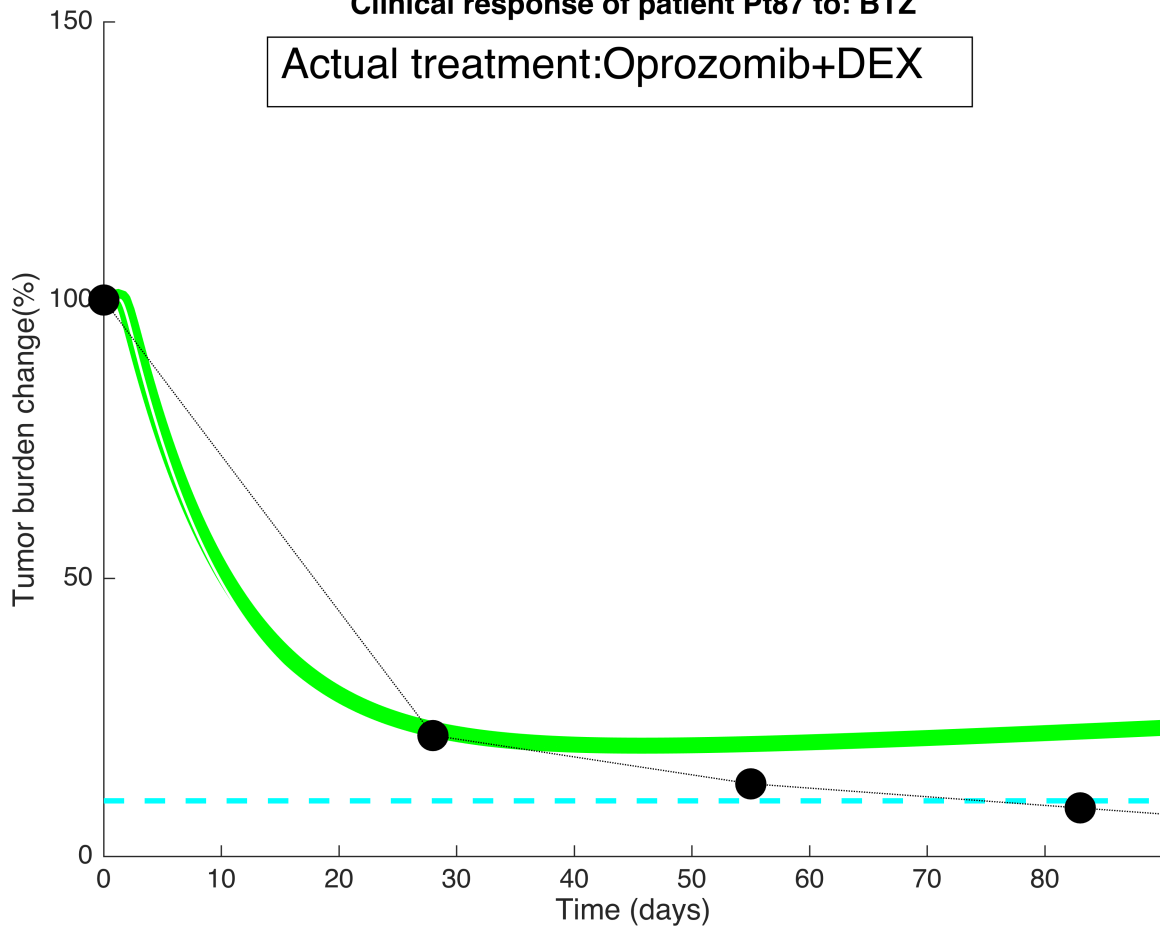

Clinical response of patient Pt94 to: BTZ

Actual treatment: V+C+D

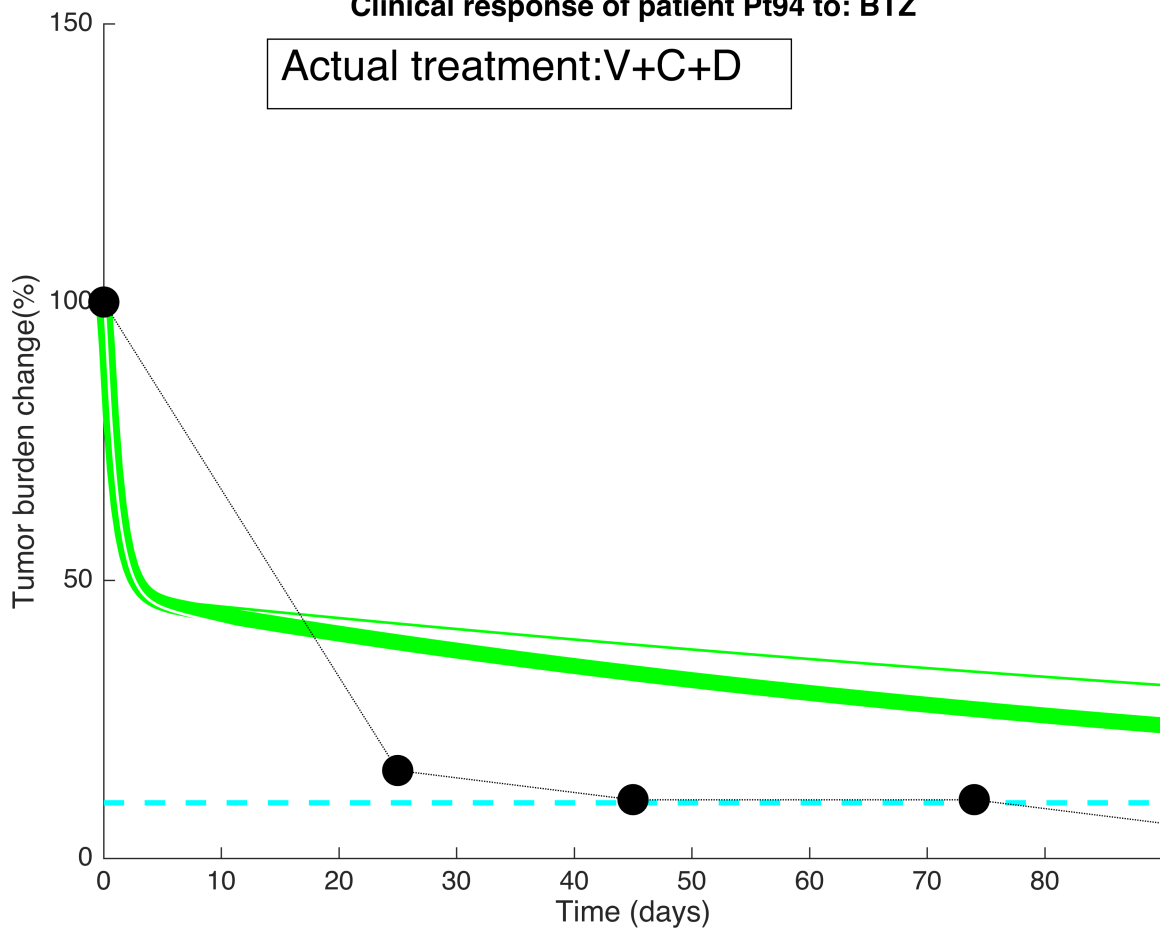

Clinical response of patient 95 to: CRM1i+DOXIL

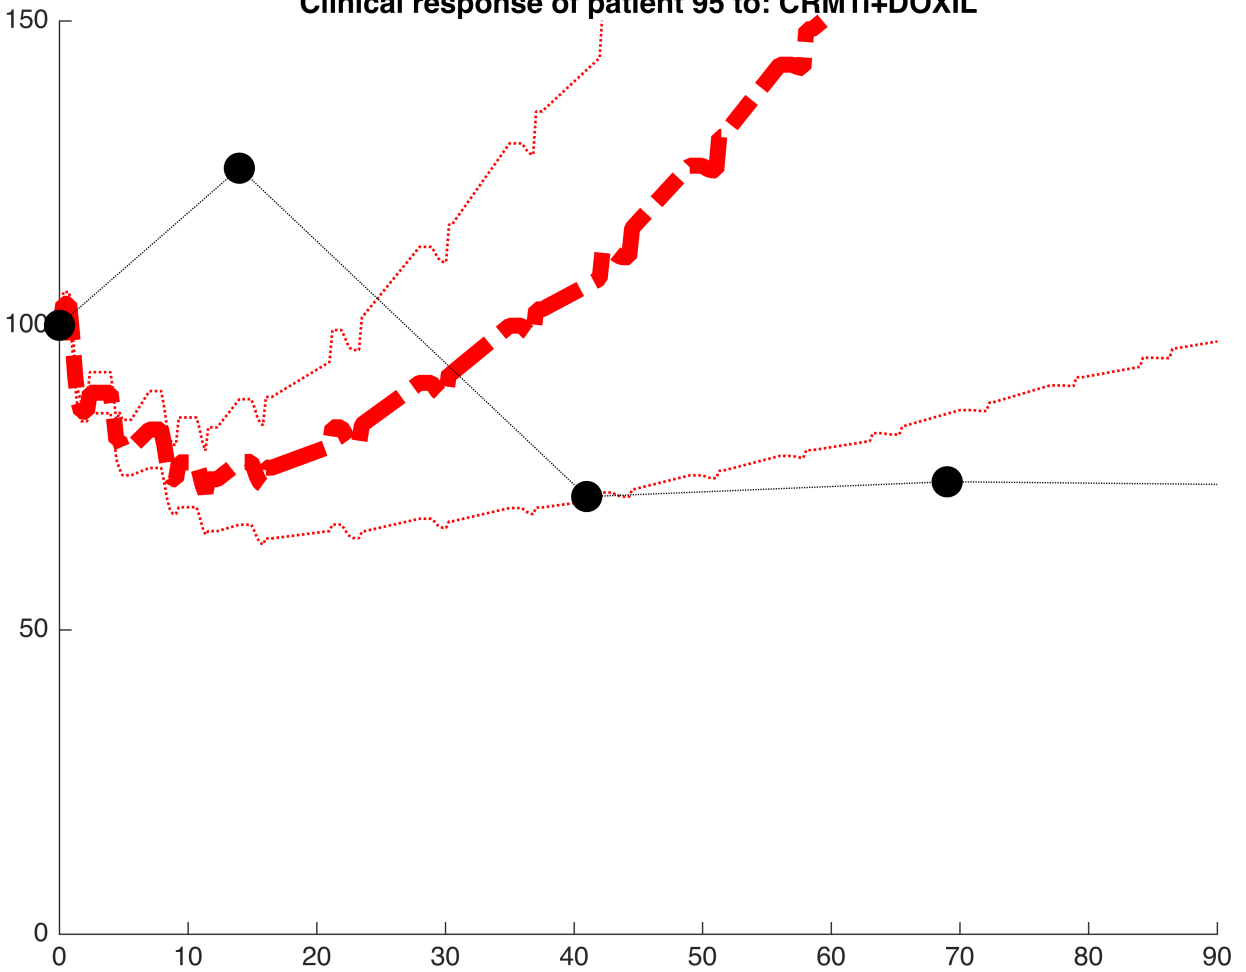



Clinical response of patient Pt97 to: MEL

Actual treatment:ASCT

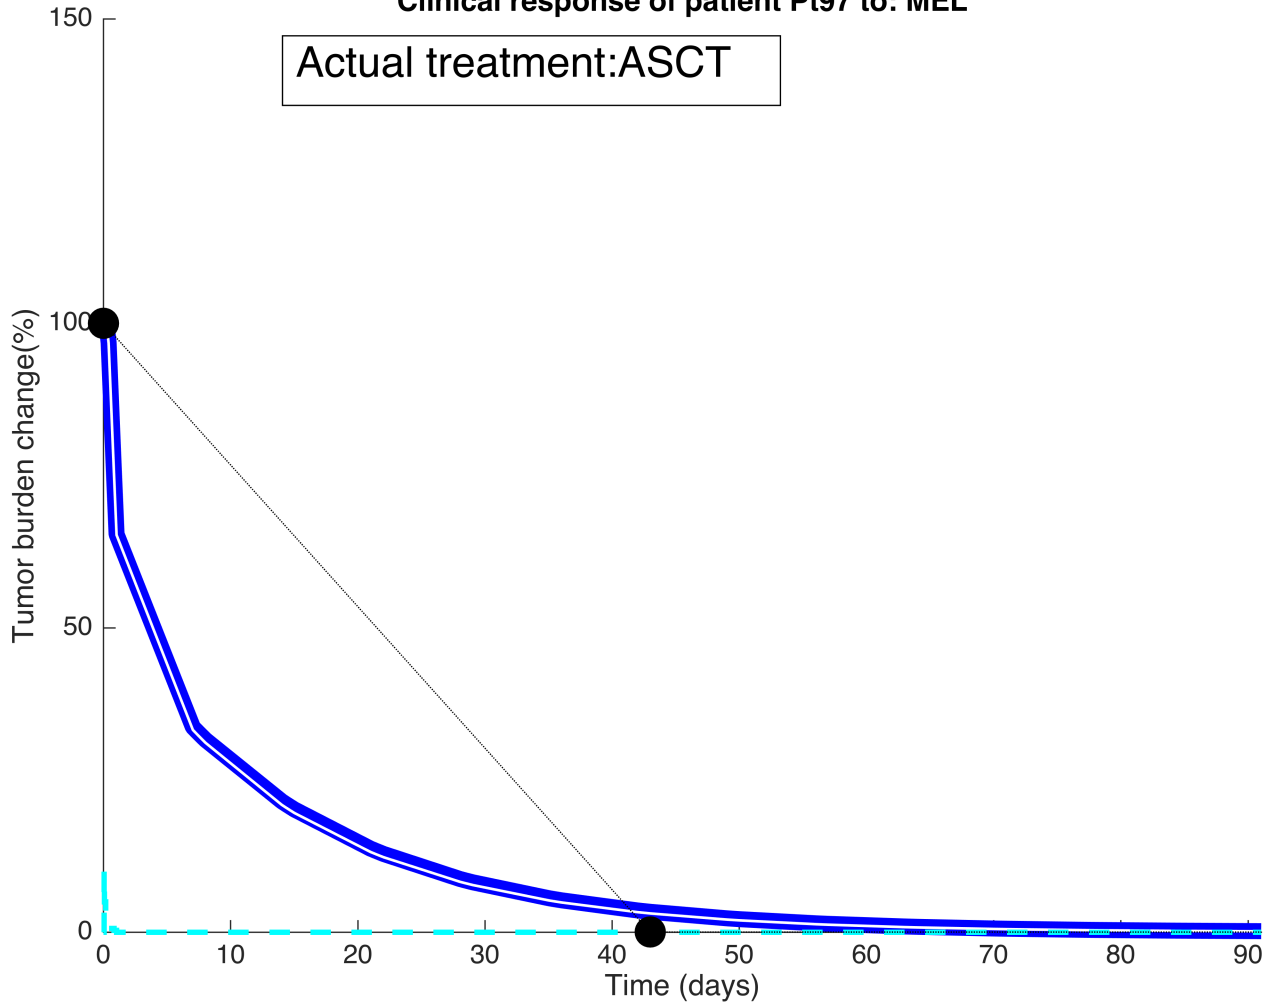

Clinical response of patient 98 to: POM+BTZ+DEX

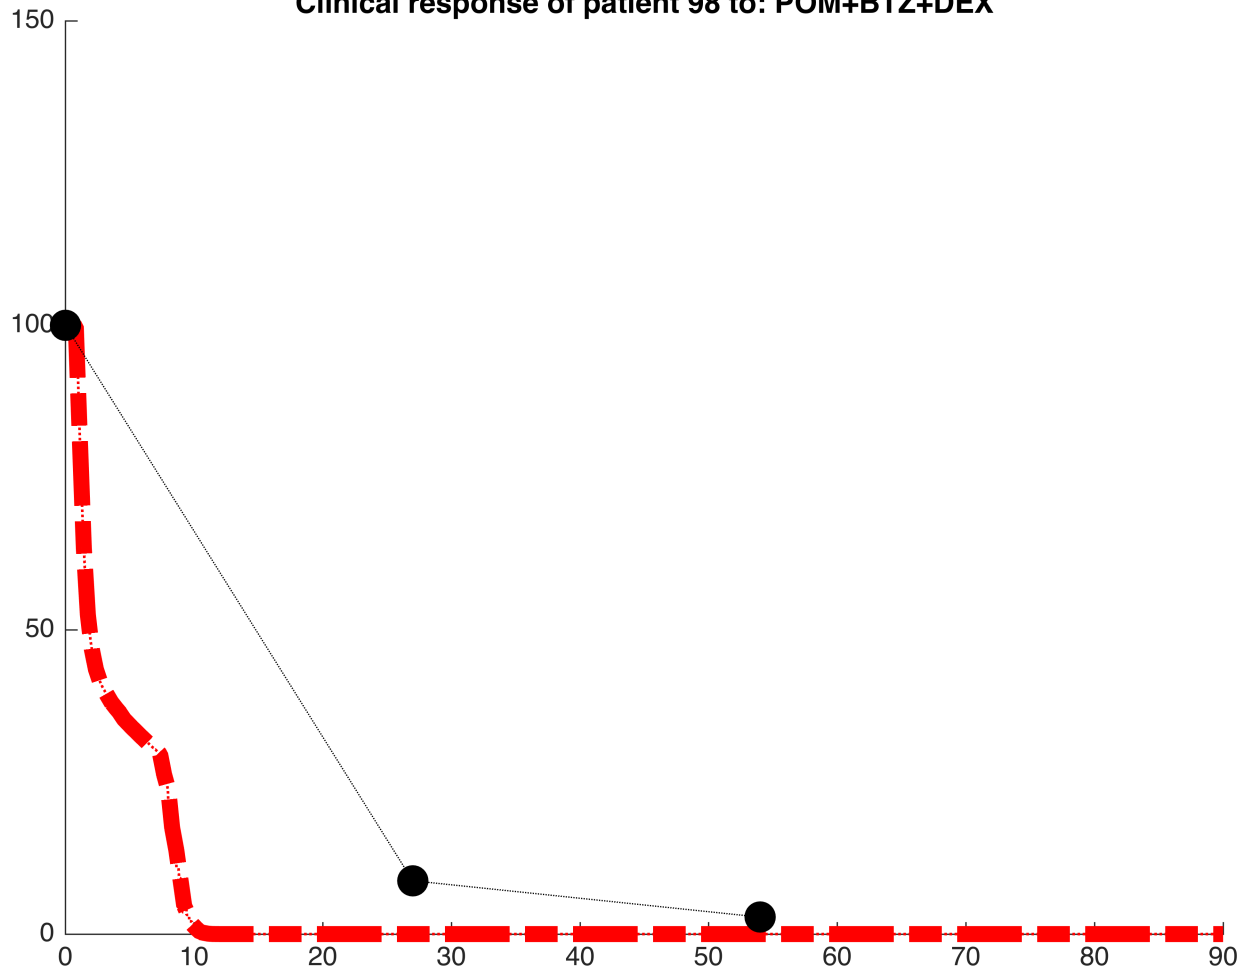

**Clinical response of patient 100 to: CFZ+DEX**

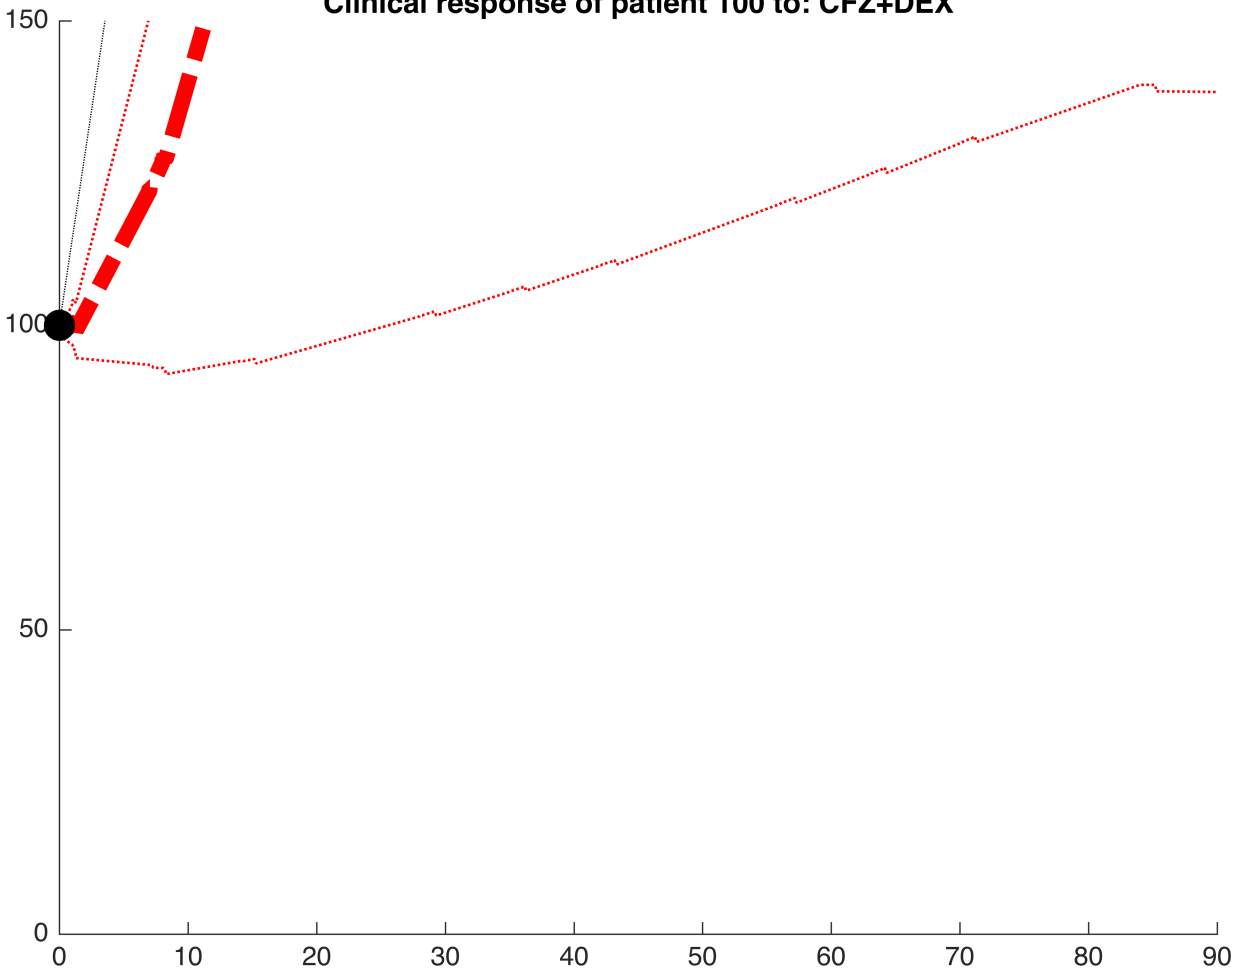

**Clinical response of patient 102 to: POM+CFZ+DEX**

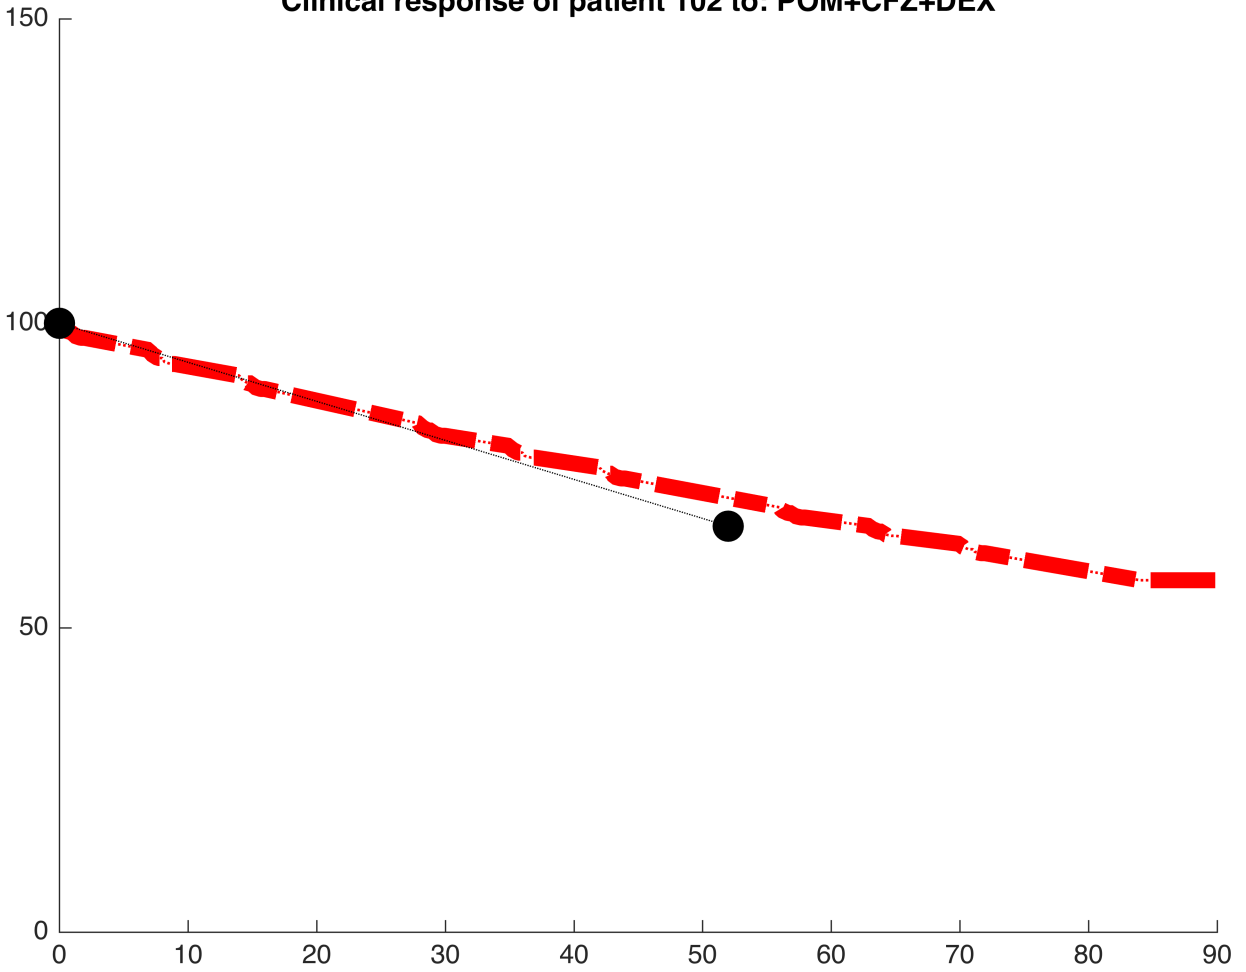

**Clinical response of patient 103 to: DEX+BTZ+POM**

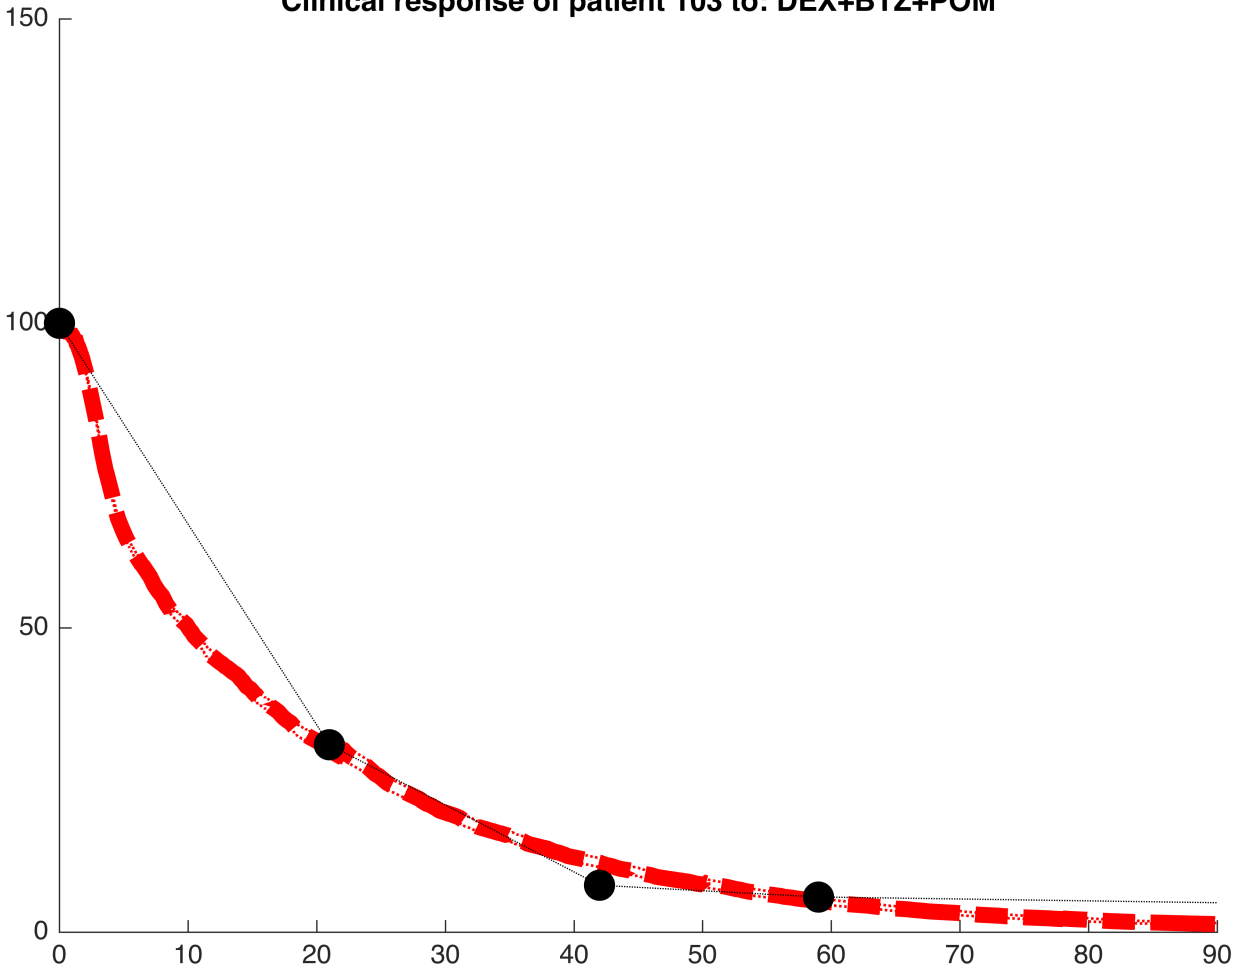

Clinical response of patient 105 to: LEN+BTZ+DEX

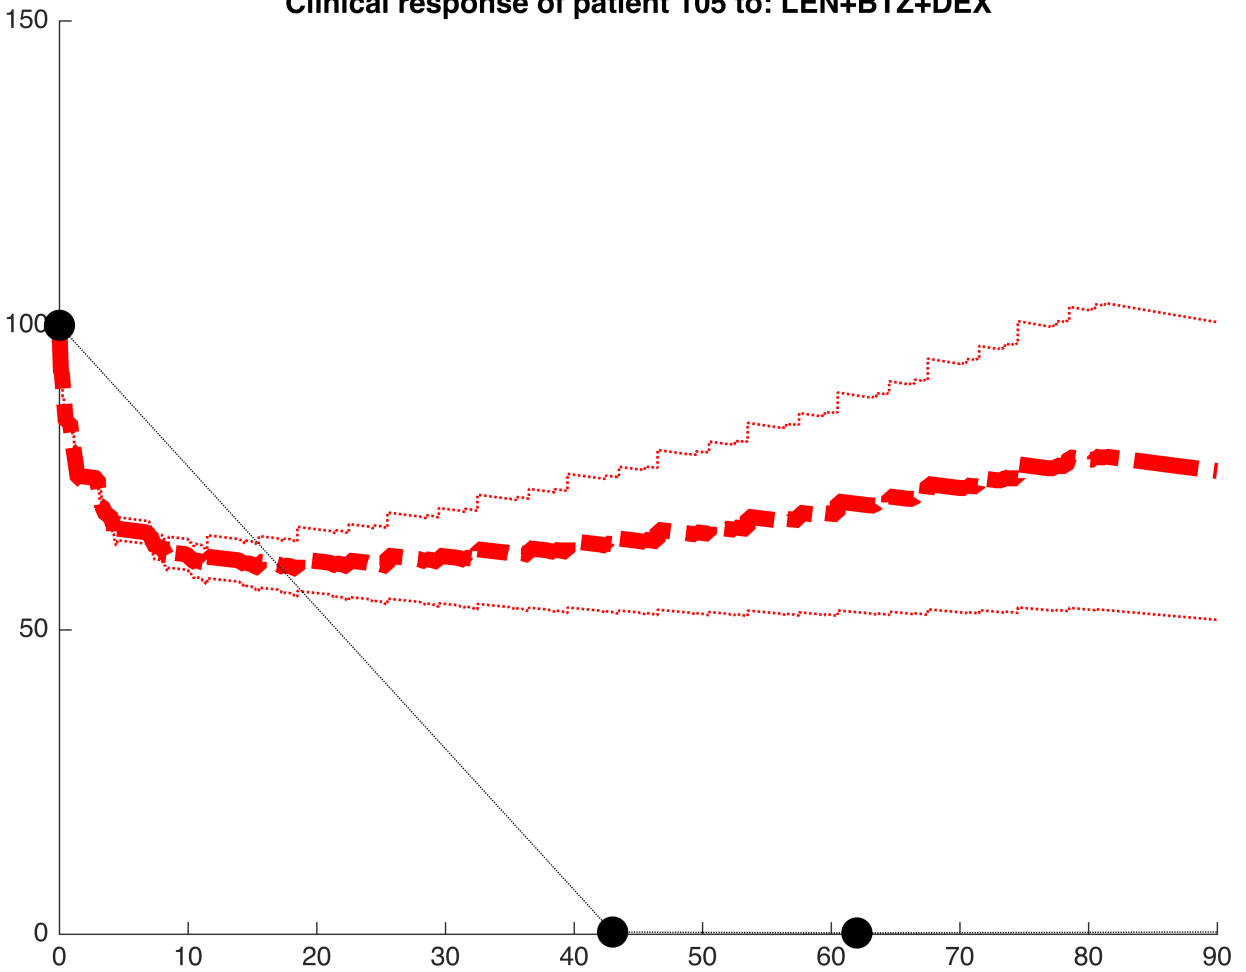

Clinical response of patient 110 to: DEX+POM

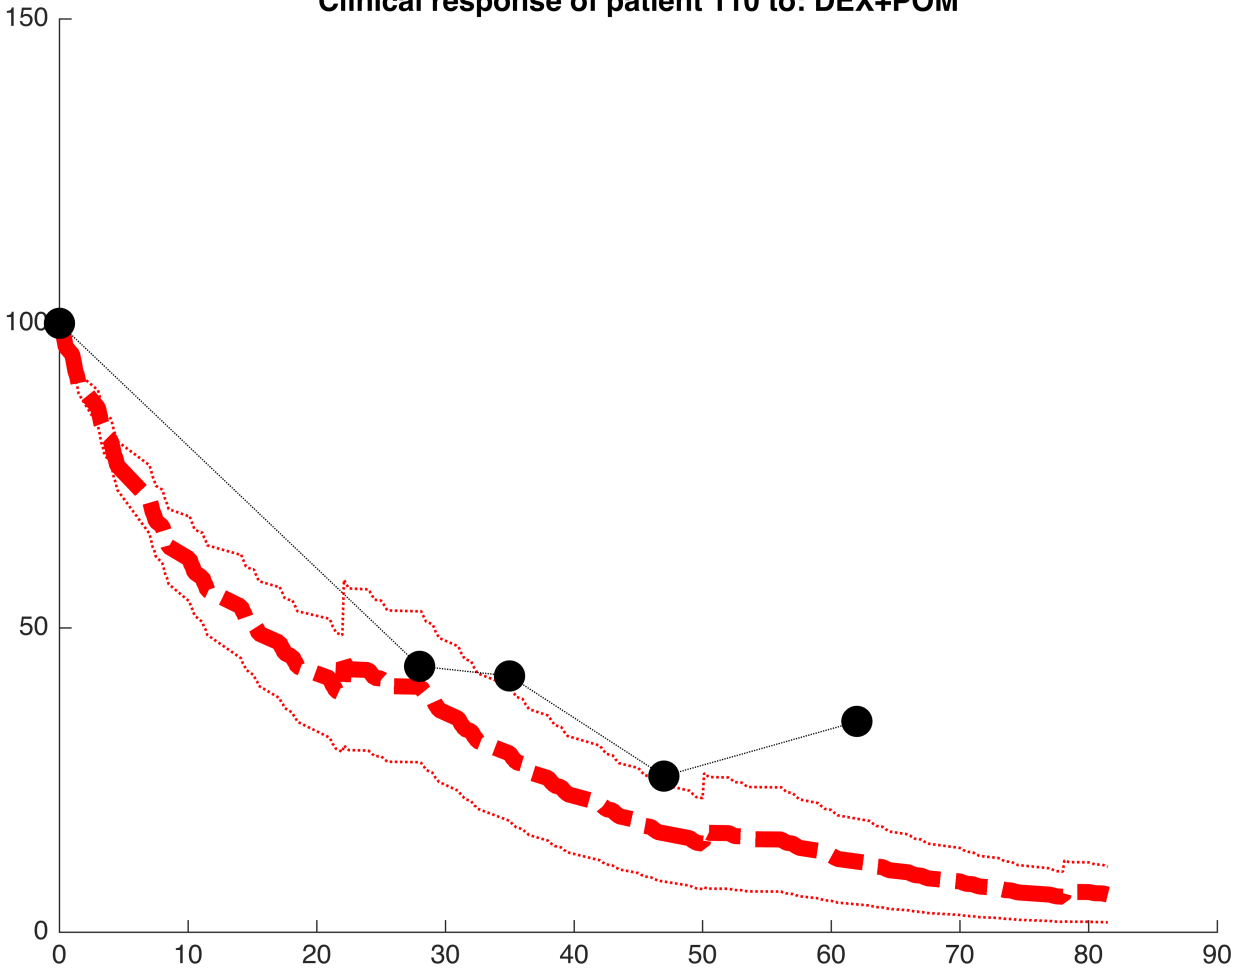

Clinical response of patient 111 to: LEN+CFZ+DEX

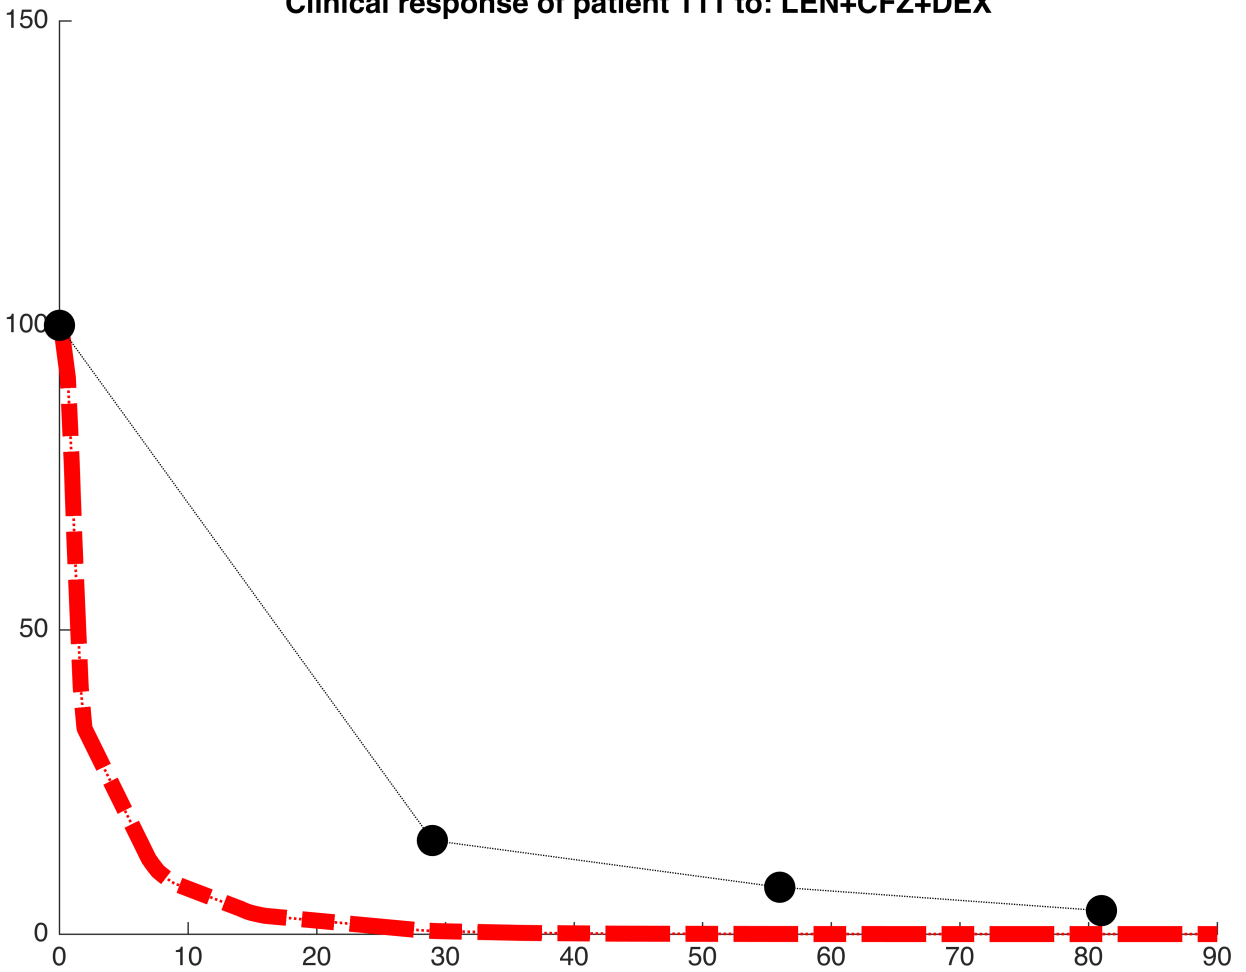



Clinical response of patient 114 to: BTZ+DEX+LEN

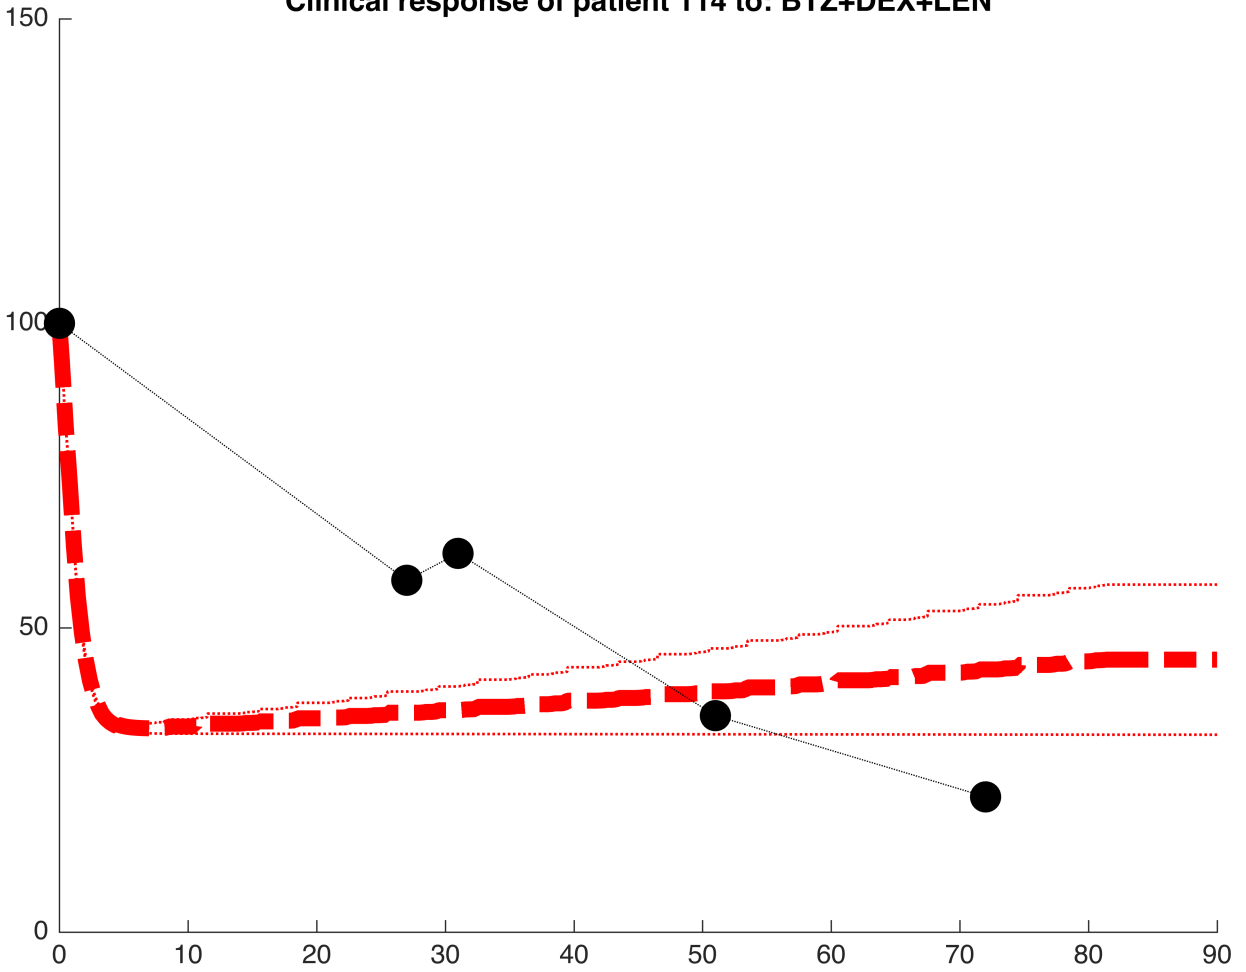

Clinical response of patient 119 to: DEX+CFZ

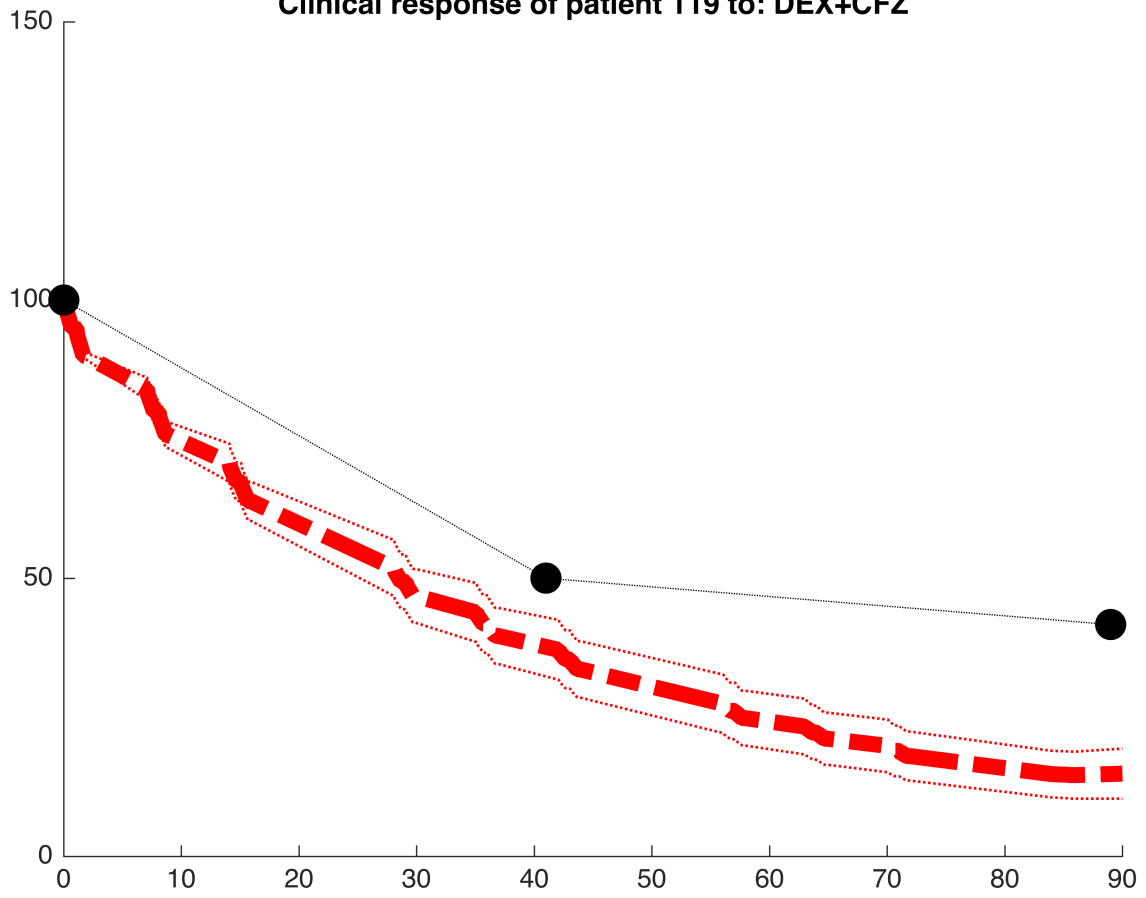

Clinical response of patient 120 to: DEX+LEN+CFZ

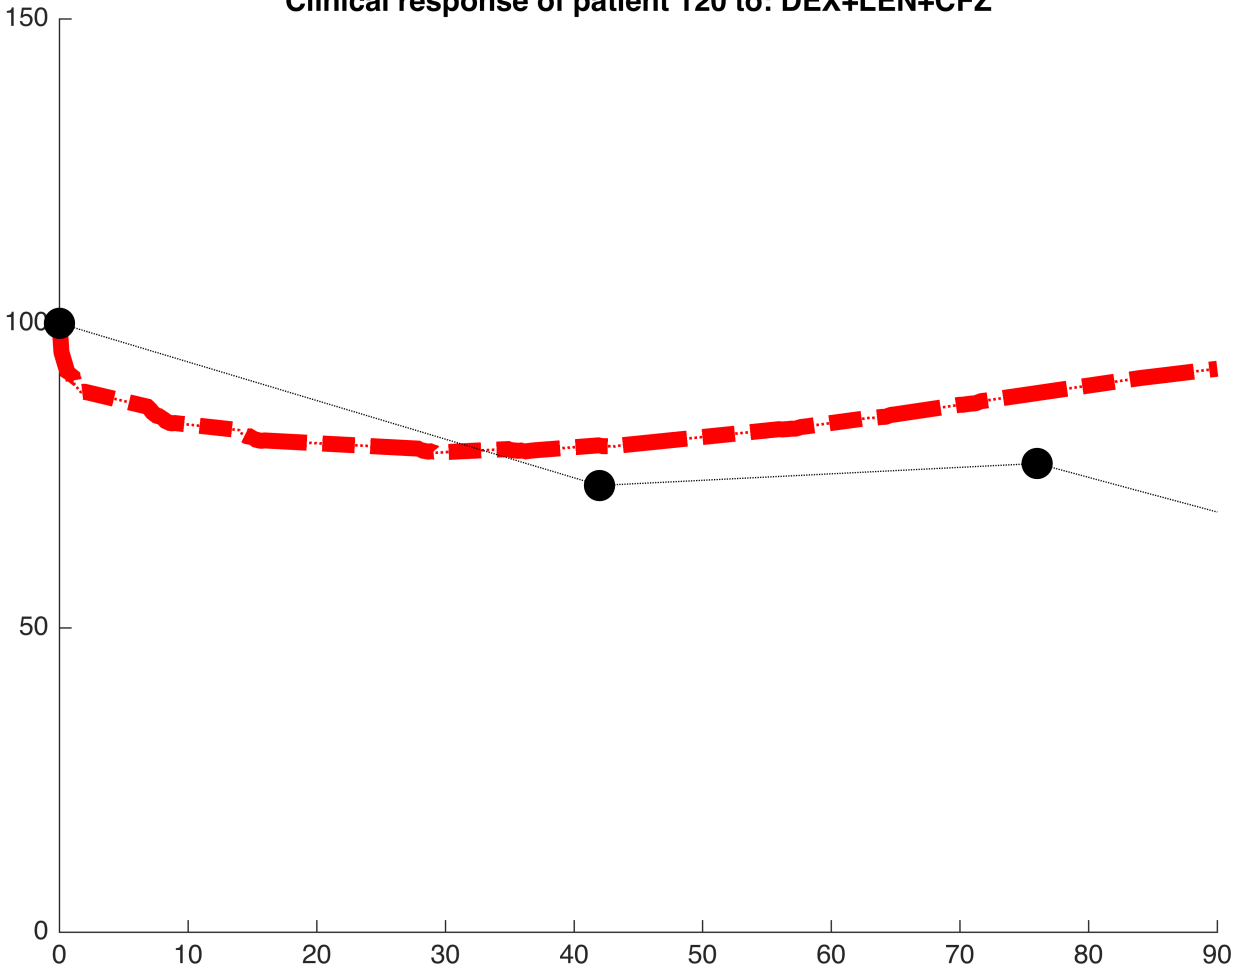

Clinical response of patient 121 to: POM+DEX

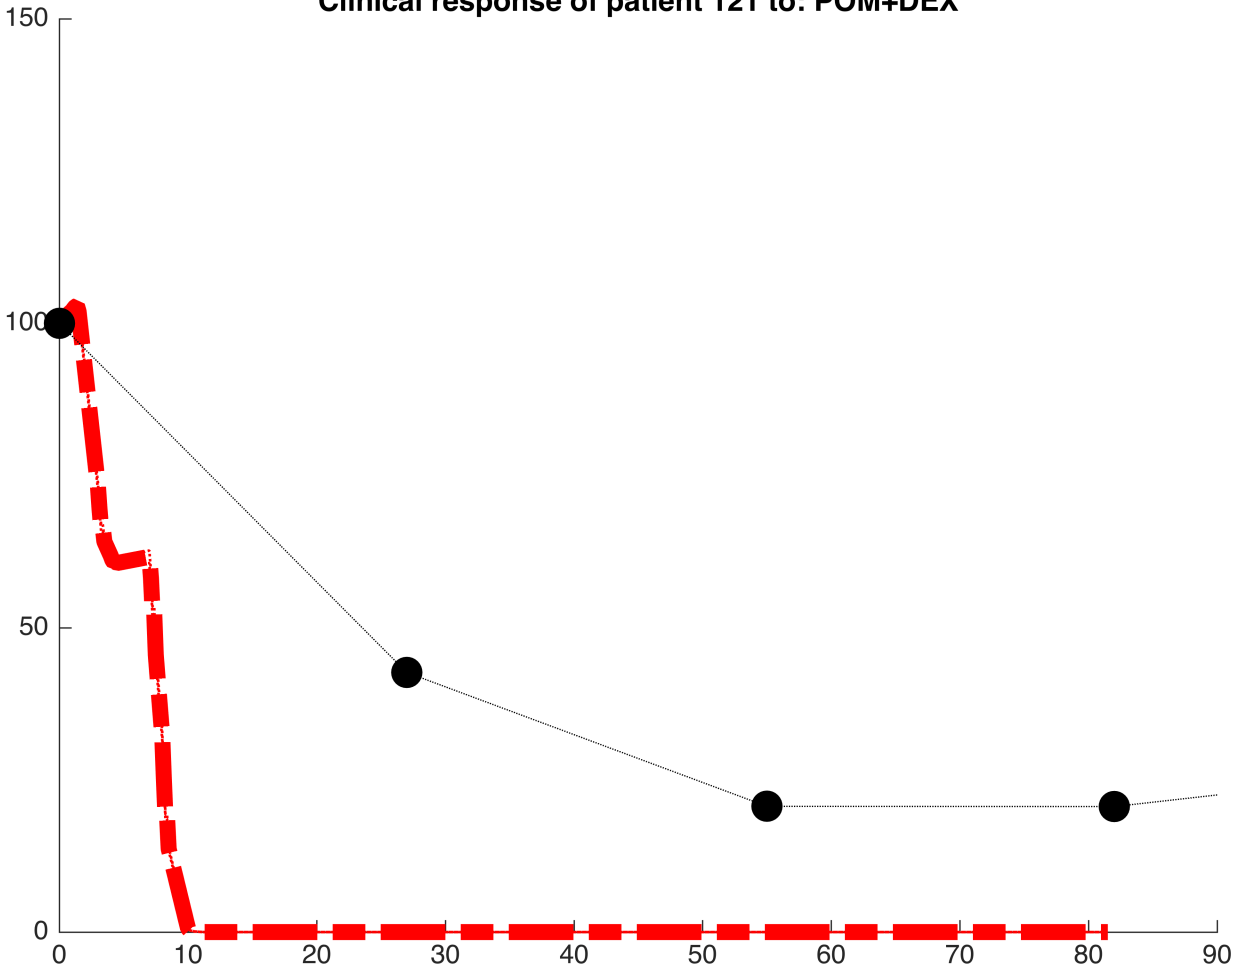

Clinical response of patient 122 to: DEX+BTZ+LEN

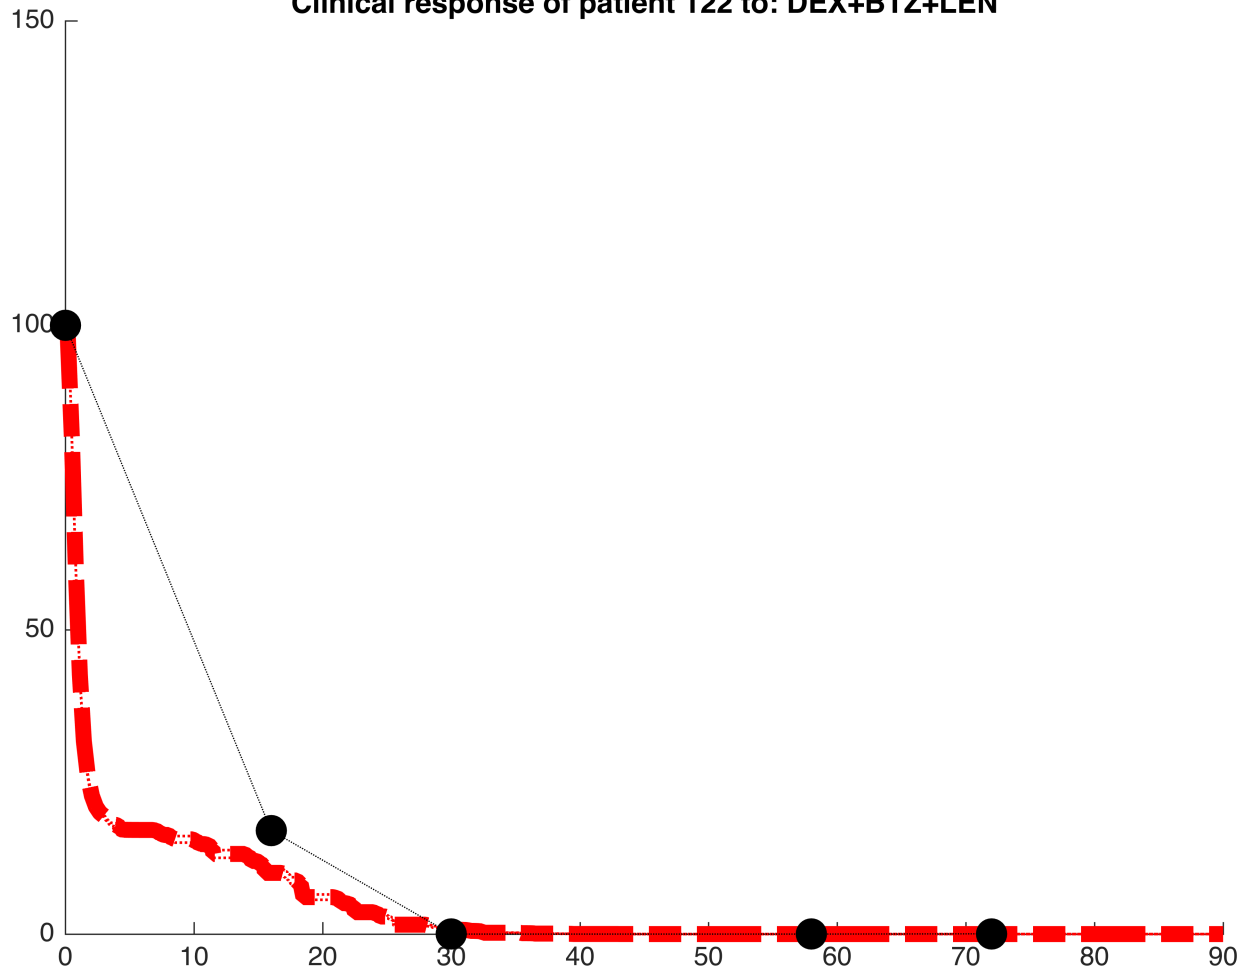

Clinical response of patient 126 to: DEX+CFZ+LEN

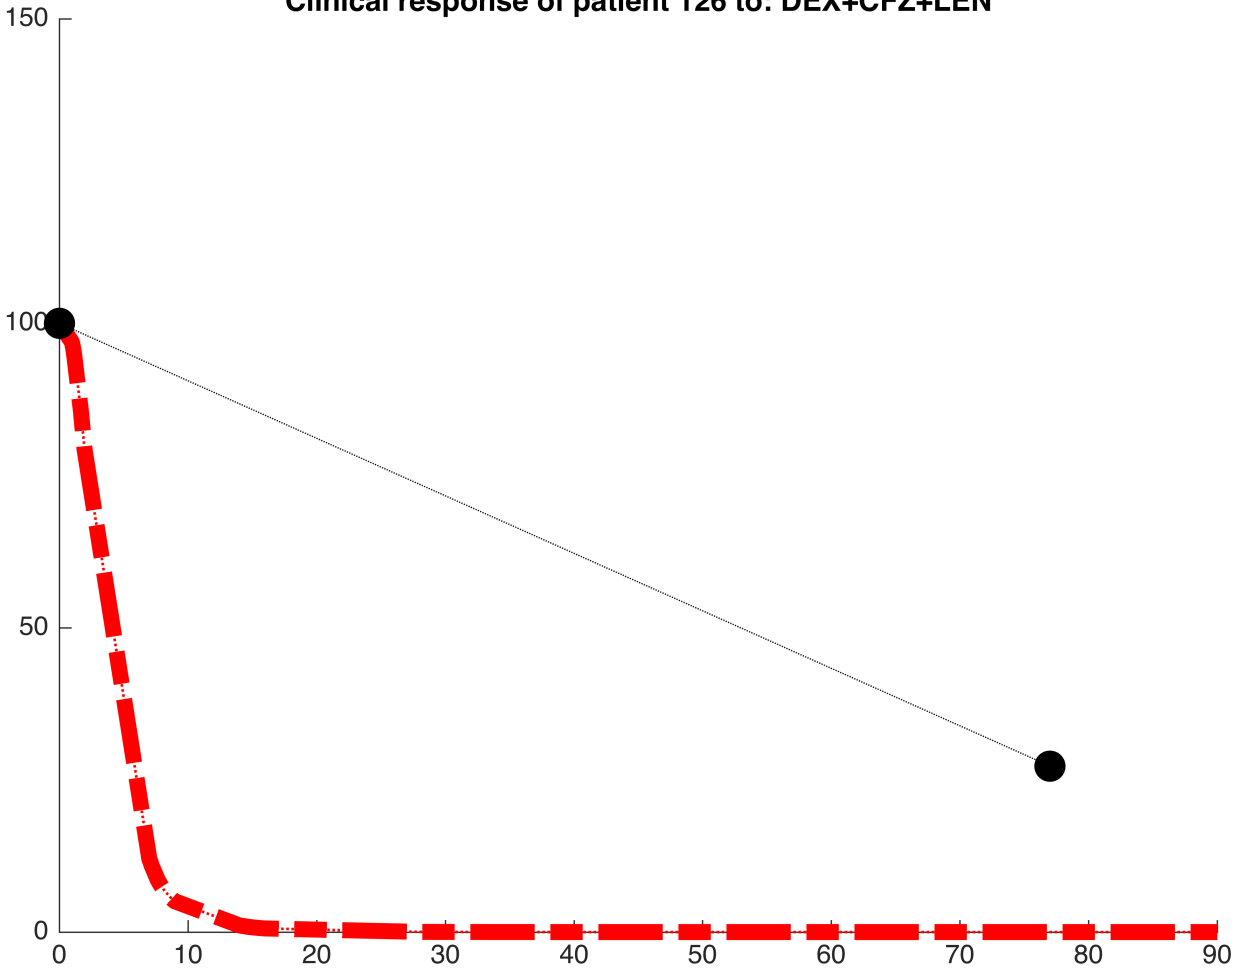

Clinical response of patient 127 to: DEX+BTZ

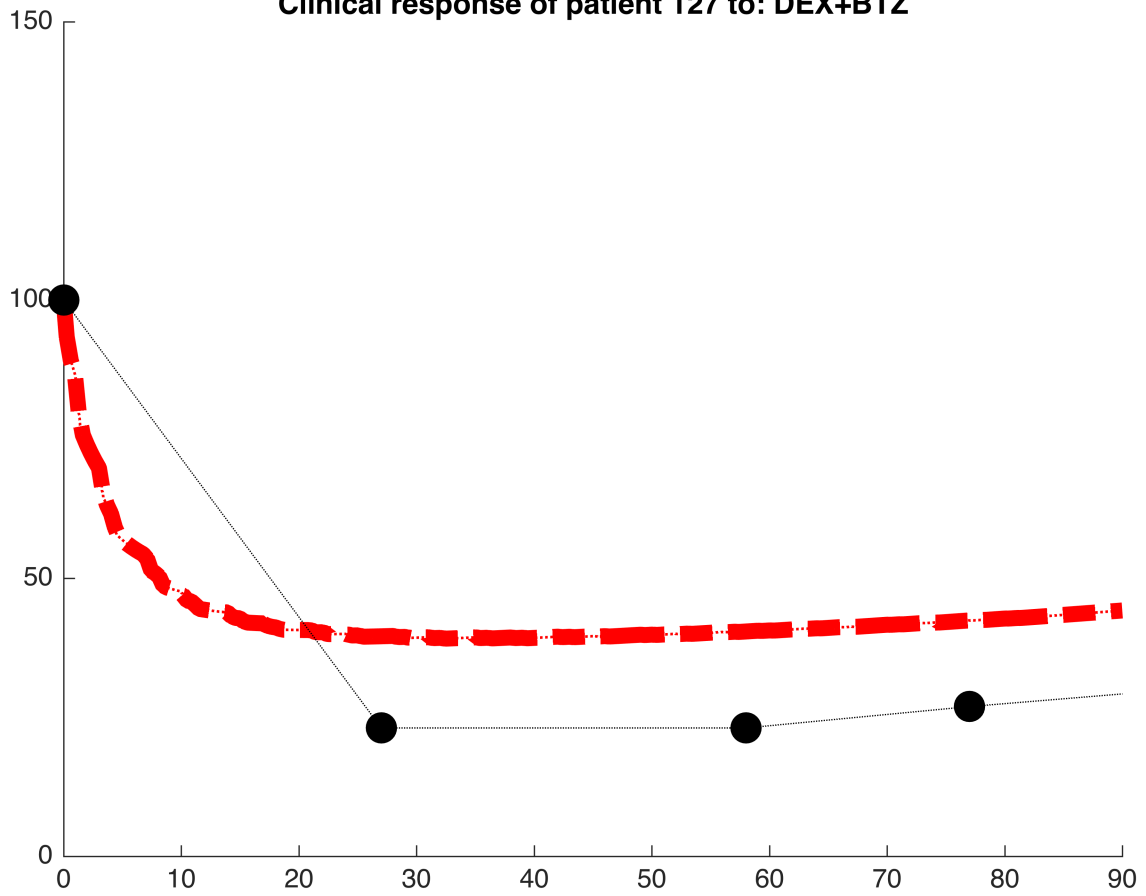

Clinical response of patient 130 to: CRM1i+DOXIL+DEX

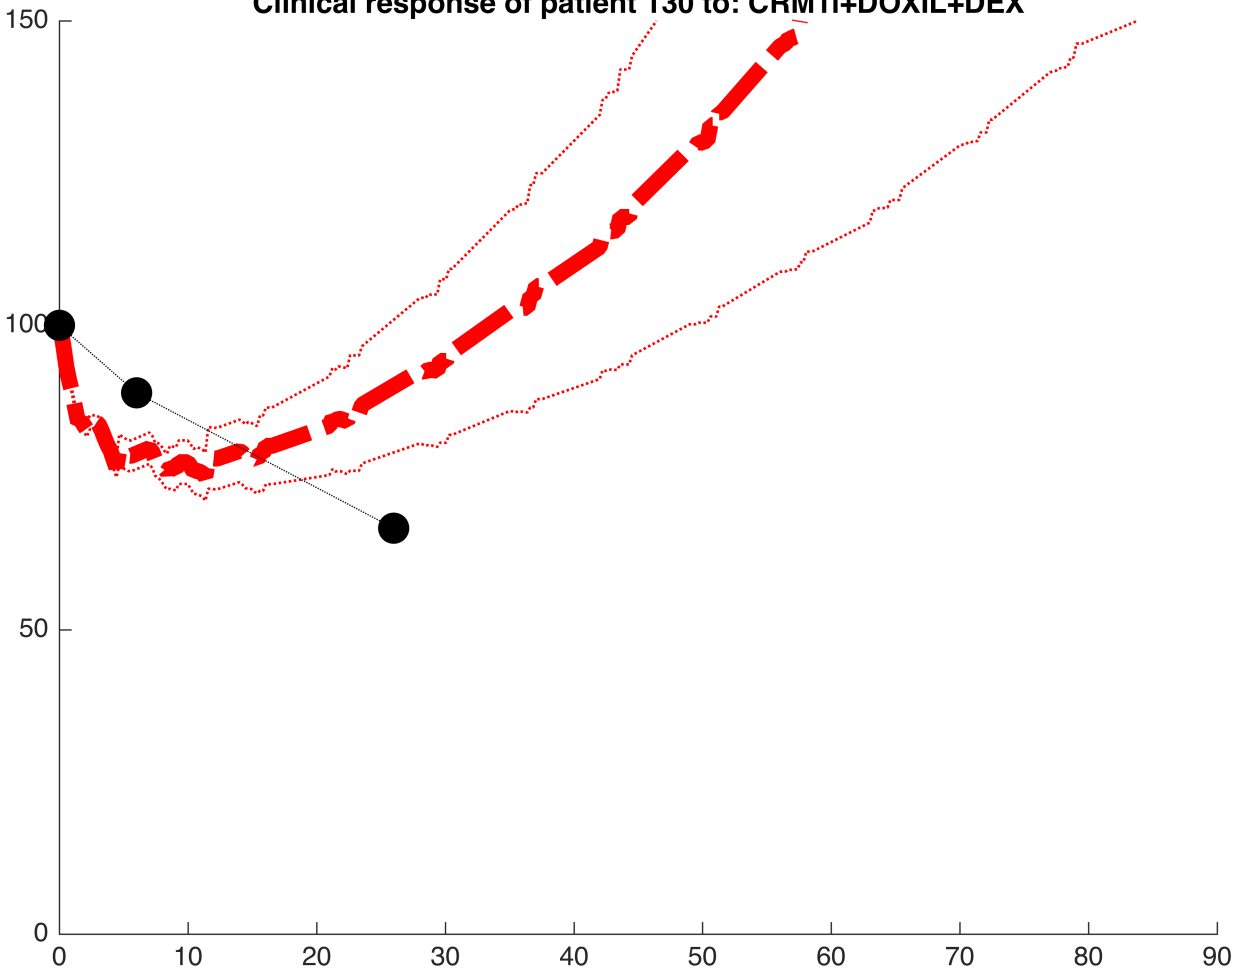

Supplement: NIHMS868648-supplement-1.pdf [file NIHMS868648-supplement-1.pdf]
